# Supplementary material
Source: ML conference proceedings conference paper supplement (https://openreview.net/forum?id=vLUW0OZGWD)
Supplement: supplementary_material [file optimism-without-regularization-paper.pdf › optimism-without-regularization-supplement/optimism-without-regularization-paper.pdf]

---

# Optimism Without Regularization: Constant Regret in Zero-Sum Games

---

Anonymous Author(s)

Affiliation

Address

email

## Abstract

1 This paper studies the *optimistic* variant of Fictitious Play for learning in two-  
2 player zero-sum games. While it is known that Optimistic FTRL – a *regularized*  
3 algorithm with a bounded stepsize parameter – obtains constant regret in this  
4 setting, we show for the first time that similar, optimal rates are also achievable  
5 *without* regularization: we prove for two-strategy games that Optimistic Fictitious  
6 Play (using *any* tiebreaking rule) obtains only *constant regret*, providing surprising  
7 new evidence on the ability of *non-no-regret* algorithms for fast learning in games.  
8 Our proof technique leverages a geometric view of Optimistic Fictitious Play in  
9 the dual space of payoff vectors, where we show a certain *energy function* of the  
10 iterates remains bounded over time. Additionally, we also prove a regret *lower*  
11 *bound* of  $\Omega(\sqrt{T})$  for *Alternating* Fictitious Play. In the unregularized regime, this  
12 separates the ability of optimism and alternation in achieving  $o(\sqrt{T})$  regret.

## 13 1 Introduction

14 Despite the fact that regularization is essential for no-regret online learning in general adversarial  
15 settings, *unregularized* algorithms are still able to obtain *sublinear regret* in the case of two-player  
16 zero-sum games. Fictitious Play (FP), dating back to [Brown \(1951\)](#), is the canonical example of  
17 such an unregularized algorithm, and it results from both players independently running Follow-the-  
18 Leader (FTL).<sup>1</sup> In the worst case, FTL can have  $\Omega(T)$  regret due to its sensitivity to oscillations in  
19 adversarially-chosen reward sequences ([Shalev-Shwartz et al., 2012](#)). However, in zero-sum game  
20 settings, the classic result of [Robinson \(1951\)](#) proved that, under Fictitious Play, the *sum* of the players’  
21 regrets (henceforth referred to as *regret*) is indeed sublinear (thus implying time-average convergence  
22 to a Nash equilibrium), albeit at the very slow  $O(T^{1-1/n})$  rate for  $n \times n$  games ([Daskalakis and Pan,](#)  
23 [2014](#)).

24 However, the recent works of [Abernethy et al. \(2021a\)](#) and [Lazarsfeld et al. \(2025\)](#) have established  
25 improved  $O(\sqrt{T})$  regret guarantees for Fictitious Play on diagonal payoff matrices (using lexico-  
26 graphical tiebreaking) and on generalized Rock-Paper-Scissors matrices (using any tiebreaking rule),  
27 respectively. As a result, there is growing evidence on the robustness of unregularized algorithms like  
28 FP (*not* a no-regret algorithm in general) for obtaining fast, sublinear regret in zero-sum games.

29 On the other hand, the past decade has seen *regularized* learning algorithms exhibit a remarkable  
30 success in providing even better  $o(\sqrt{T})$  regret guarantees for learning in games. In zero-sum games,  
31 *optimistic* variants of FTRL (including Optimistic Multiplicative Weights and Optimistic Gradient  
32 Descent) obtain only *constant* regret (with respect to the time horizon  $T$ ), implying optimal  $O(1/T)$   
33 time-average convergence to Nash ([Rakhlin and Sridharan, 2013](#); [Syrgkanis et al., 2015](#)). While such

---

<sup>1</sup>FTL is a particular instance of Follow-the-Regularized-Leader (FTRL) with unbounded stepsize  $\eta \rightarrow \infty$ .

guarantees can be obtained using absolute constant stepsizes (with no dependence on  $T$ ), standard proof techniques (e.g., the RVU bound approach of Syrgkanis et al. (2015)) still crucially require a finite upper bound on stepsize, corresponding to constant magnitudes of regularization. This raises the following, fundamental question: *Is  $O(1)$  regret attainable in zero-sum games without regularization (equivalently, with unbounded stepsizes)? Can variants of Fictitious Play achieve  $O(1)$  regret?*

Apart from its theoretical interest, this question admits crucial applications in the context of equilibrium computation algorithms for combinatorial games (Beaglehole et al., 2023), as well as during training via self-play in certain multi-agent reinforcement learning settings (Vinyals et al., 2019).

## 1.1 Our Contributions

In this work, we establish an affirmative answer to the question above. Our main result establishes that, in the case of  $2 \times 2$  zero-sum games, *Optimistic Fictitious Play* obtains constant regret:

**Informal Theorem** (See Theorem 3.1). *Optimistic Fictitious Play, using any tiebreaking rule, obtains  $O(1)$  regret in all  $2 \times 2$  zero-sum games with a unique, interior Nash equilibrium.*

Our result gives surprising new evidence that, even without regularization, optimism can be used to obtain an accelerated regret bound, matching the optimal rate obtained by regularized Optimistic FTRL algorithms (Syrgkanis et al., 2015). While our theorem establishes constant regret only for the case of two-strategy zero-sum games, our proof techniques offer indication that similar, optimal regret bounds may further hold in higher-dimensional settings. Apart from our theoretical results, we also experimentally evaluate Optimistic FP on higher-dimensional zero-sum games, and these evaluations suggest that, even for much larger games, Optimistic FP still obtains constant regret.

Our proof technique is based on a novel geometric perspective of Optimistic FP in the dual space of payoff vectors. Our main technical contribution is showing that an *energy function* of the dual iterates of the algorithm is upper bounded by a constant. This energy upper bound can then be easily used to establish constant regret of the primal iterates. The latter comes in contrast to the energy growth of the iterates of standard FP, which strictly increases over time (Lazarsfeld et al., 2025).

We also consider the *alternating* variant of Fictitious Play. Recent work has studied the use of alternation (independently of optimism) as a method for obtaining  $o(\sqrt{T})$  regret guarantees in both the adversarial (Gidel et al., 2019; Bailey et al., 2020; Cevher et al., 2023; Hait et al., 2025) and the zero-sum game setting (Wibisono et al., 2022; Katona et al., 2024). Contrary to *optimism*, we show in the case of *alternation* that regularization is necessary to achieve  $o(\sqrt{T})$  regret:

**Informal Theorem** (See Theorem 3.2). *On the  $2 \times 2$  Matching Pennies game, Alternating Fictitious Play, using any tiebreaking rule and for nearly all initializations, has regret at least  $\Omega(\sqrt{T})$ .*

Together, our results separate the regret guarantees of using optimism and alternation in the regime of no regularization: while optimism without regularization can obtain optimal  $O(1)$  regret (Theorem 3.1), alternation alone is in general insufficient for improving beyond  $O(\sqrt{T})$  (Theorem 3.2), the same rate achievable by standard (non-alternating) FP in the  $2 \times 2$  setting. To this latter point, note that the lower bound of Theorem 3.2 comes in contrast to the improved  $O(T^{1/5})$  rate obtainable by Alternating FTRL under a sufficiently small stepsize (Katona et al., 2024).

Table 1 summarizes our results and the landscape of regret guarantees in the  $2 \times 2$  setting for FTRL and FP variants, and Figure 1 shows an example of the empirical regret guarantees of standard, Optimistic, and Alternating FP variants in several games (additional results are presented in Sections 5 and E).

|                                | Standard        | Optimistic | Alternating           |
|--------------------------------|-----------------|------------|-----------------------|
| $\eta$ bounded (FTRL)          | $O(\sqrt{T})$ † | $O(1)$ ^   | $O(T^{1/5})$ ^^       |
| $\eta \rightarrow \infty$ (FP) | $O(\sqrt{T})$ ‡ | $O(1)$ *   | $\Omega(\sqrt{T})$ ** |

Table 1: Regret guarantees for FTRL and Fictitious Play variants in  $2 \times 2$  zero-sum games, with our contributions shaded in gray. †: Using the standard setting of  $\eta = 1/\sqrt{T}$  (Shalev-Shwartz et al., 2012). ^: Via the RVU bounds of Syrgkanis et al. (2015). ^^: (Katona et al., 2024), extending on the prior  $O(T^{1/3})$  bound of Wibisono et al. (2022). ‡: Implicit in the proof of Robinson (1951). \*: Theorem 3.1. \*\*: Theorem 3.2.

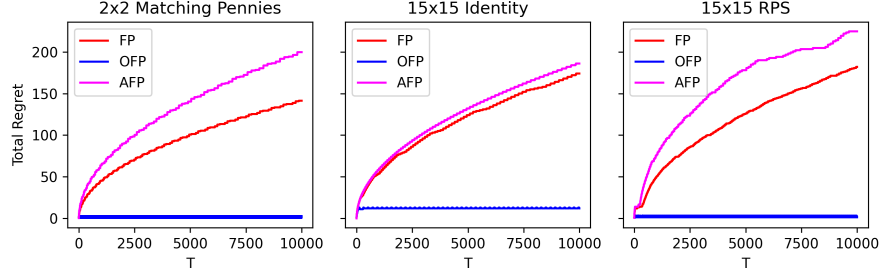

Figure 1: Empirical regret of standard (FP), Optimistic (OFP), and Alternating (AFP) Fictitious Play in Matching Pennies (from  $x_1^0 = (1/3, 2/3)$ ,  $x_2^0 = (2/3, 1/3)$ ), on the  $15 \times 15$  identity matrix (from  $x_1^0 = e_1$ ,  $x_2^0 = e_n$ ), and on  $15 \times 15$  generalized Rock-Paper-Scissors (from  $x_1^0 = e_1$ ,  $x_2^0 = e_n$ ). Each algorithm was run for  $T = 10000$  iterations using a lexicographical tiebreaking rule. Each subfigure demonstrates the constant empirical regret of OFP compared to the roughly  $\sqrt{T}$  regret growth of standard FP and AFP. More experimental details and results are given in Section 5 and Section E.

## 1.2 Other Related Work

**Optimistic learning in games.** Our work relates to a line of research on the convergence properties of optimistic and extragradient-type algorithms in both normal-form and extensive-form games (Daskalakis et al., 2021; Fasloulakis et al., 2022; Anagnostides et al., 2022a; Zhang et al., 2024; Farina et al., 2022; Hsieh et al., 2022; Anagnostides et al., 2022b; Piliouras et al., 2022; Anagnostides et al., 2022c). As previously noted, a key difference is that these approaches typically rely on constant or time-decreasing step sizes, corresponding to some level of regularization. Recent works have also investigated last-iterate convergence properties of optimistic and extragradient methods (Daskalakis and Panageas, 2019; Cai et al., 2022; Abernethy et al., 2021b; Hsieh et al., 2020), as well as for variants of regret-matching, including under alternation (Cai et al., 2025a). Other works have studied accelerated rates using optimism *without* regularization in certain Frank-Wolfe-type, convex-concave saddle-point problems (Wang and Abernethy, 2018; Abernethy et al., 2018).

**Learning in  $2 \times 2$  games.** Our work adds to a growing recent literature studying online learning algorithms in  $2 \times 2$  games: in two-strategy zero-sum games, Bailey and Piliouras (2019) proved that Online Gradient Descent obtains  $O(\sqrt{T})$  regret even with large constant stepsizes. More recent works of Cai et al. (2024) and Cai et al. (2025b) establish lower-bounds on the last-iterate and random-iterate convergence rates of Optimistic MWU using a hard  $2 \times 2$  construction, as well as an  $O(T^{1/6})$  upper bound on best-iterate convergence for  $2 \times 2$  zero-sum games. Chen and Peng (2020) similarly used a  $2 \times 2$  construction to establish a general  $\Omega(\sqrt{T})$  lower bound on the regret of standard Multiplicative Weights. In a family of two-strategy congestion games, Chotibut et al. (2021) also showed that the iterates of Multiplicative Weights can exhibit formally chaotic behavior.

**Fictitious Play.** We refer the reader to the recent results of Daskalakis and Pan (2014), Abernethy et al. (2021a), and Lazarsfeld et al. (2025) (and the references therein) for background on standard Fictitious Play. Abernethy et al. (2021a) also briefly introduced the optimistic variant of Fictitious Play, and they informally conjecture the algorithm to have constant regret on diagonal payoff matrices. The convergence behavior of FP has also been studied in potential games (Monderer and Shapley, 1996; Panageas et al., 2023), near-potential games (Candogan et al., 2013), Markov games (Sayin et al., 2022; Baudin and Laraki, 2022), and extensive-form games (Heinrich et al., 2015).

## 2 Preliminaries

Let  $[n] = \{1, \dots, n\}$ , let  $\Delta_n$  be the probability simplex in  $\mathbb{R}^n$ , and let  $\{e_i\}_n = \{e_i : i \in [n]\} \subset \Delta_n$  denote the set of standard basis vectors in  $\mathbb{R}^n$ , which correspond to vertices of  $\Delta_n$ . For  $x \in \Delta_n$ , we say  $x$  is *interior* if  $x_i > 0$  for all  $i \in [n]$ .

### 2.1 Online Learning in Zero-Sum Games

Let  $A \in \mathbb{R}^{m \times n}$  be the payoff matrix for a two-player zero-sum game, and let  $T$  be a fixed time horizon. At round  $t$ , Players 1 and 2 simultaneously choose mixed strategies  $x_1^t \in \Delta_m$  and  $x_2^t \in \Delta_n$ , obtain payoffs  $\langle x_1^t, Ax_2^t \rangle$  and  $-\langle x_2^t, A^\top x_1^t \rangle$ , and observe feedback  $Ax_2^t$  and  $-A^\top x_1^t$ , respectively.

**Regret and Convergence to Nash.** Each player seeks to maximize their cumulative payoff, and their performance is measured by the individual regrets  $\text{Reg}_1(T) = \max_{x \in \Delta_m} \sum_{t=1}^T \langle x - x_1^t, Ax_2^t \rangle$  and  $\text{Reg}_2(T) = \min_{x \in \Delta_n} \sum_{t=1}^T \langle x_2^t - x, A^\top x_1^t \rangle$ . From a global perspective, we study the *total regret* (henceforth *regret*)  $\text{Reg}(T) = \text{Reg}_1(T) + \text{Reg}_2(T)$  given by

$$\text{Reg}(T) = \max_{x \in \Delta_m} \langle x, \sum_{t=0}^T Ax_2^t \rangle - \min_{x \in \Delta_n} \langle x, \sum_{t=0}^T A^\top x_1^t \rangle. \quad (1)$$

It is well known that sublinear bounds on  $\text{Reg}(T)$  correspond to convergence (in duality gap) of the players' time-average iterates to a Nash equilibrium (NE) of  $A$ . Recall that the duality gap of a joint strategy profile  $(x_1, x_2)$  is given by  $\text{DG}(x_1, x_2) = \max_{x'_1 \in \Delta_m} \langle x'_1, Ax_2 \rangle - \min_{x'_2 \in \Delta_n} \langle x'_2, A^\top x_1 \rangle$ , and that  $(x_1^*, x_2^*)$  is an NE of  $A$  if and only if  $\text{DG}(x_1^*, x_2^*) = 0$ . Then the following relationship holds (see Section A for a proof):

**Proposition 2.1.** Let  $\tilde{x}_1^T = \frac{1}{T}(\sum_{t=0}^T x_1^t)$  and  $\tilde{x}_2^T = \frac{1}{T}(\sum_{t=0}^T x_2^t)$  denote the time-average iterates of Players 1 and 2, respectively, and suppose  $\text{Reg}(T) = o(T)$ . Then  $(\tilde{x}_1^T, \tilde{x}_2^T)$  converges (in duality-gap) to an NE of  $A$  at a rate of  $\text{Reg}(T)/T = o(1)$ .

## 2.2 Fictitious Play and Optimistic Fictitious Play

We now introduce the Optimistic Fictitious Play (and standard Fictitious Play) algorithms. The primal update rules for both standard and Optimistic Fictitious Play can be described via the following  $\alpha$ -Optimistic Fictitious Play ( $\alpha$ -OFP) expression:

$$\begin{aligned} x_1^{t+1} &:= \underset{x \in \{e_i\}_m}{\text{argmax}} \langle x, \sum_{k=0}^t Ax_2^k + \alpha Ax_2^t \rangle \\ x_2^{t+1} &:= \underset{x \in \{e_i\}_n}{\text{argmax}} \langle x, \sum_{k=0}^t -A^\top x_1^k - \alpha A^\top x_1^t \rangle. \end{aligned} \quad (\alpha\text{-OFP})$$

When  $\alpha = 0$ , then ( $\alpha$ -OFP) recovers standard Fictitious Play, where each player's strategy at time  $t + 1$  is a best response to the sum of its feedback vectors through round  $t$ . Optimistic Fictitious Play (OFP) is the setting of ( $\alpha$ -OFP) with  $\alpha = 1$ . Observe this recovers the *unregularized variant* of Optimistic FTRL (equivalently, with  $\eta \rightarrow \infty$ ) in the zero-sum game setting (c.f., (Rakhlin and Sridharan, 2013; Syrgkanis et al., 2015)), which adds bias to the most recent feedback vector.

**Remark 2.2 (Tiebreaking Rules).** Observe that the argmax sets in ( $\alpha$ -OFP) may contain multiple vertices. For this, we assume that the argmax operator encodes a *tiebreaking rule* that returns a distinct element. Throughout, we make *no assumptions on the nature of the tiebreaking rule*, and in general ties can be broken deterministically, randomly, or adaptively/adversarially.

**Dual payoff vectors and primal-dual update.** Optimistic FP can be equivalently written with respect to the *cumulative* payoff vectors  $y_1^t = \sum_{k=0}^{t-1} Ax_2^k \in \mathbb{R}^m$  and  $y_2^t = \sum_{k=0}^{t-1} -A^\top x_1^k \in \mathbb{R}^n$ . Specifically, the iterates of the algorithm can be expressed in the following *primal-dual* form:

**Definition 2.3.** Let  $y_1^0 = 0 \in \mathbb{R}^m$  and  $y_2^0 = 0 \in \mathbb{R}^n$ , and fix any initial  $x_1^0 \in \Delta_m$  and  $x_2^0 \in \Delta_n$ . Then for  $t \geq 1$ , the dual (i.e.,  $(y_1^t, y_2^t)$ ) and primal (i.e.,  $(x_1^t, x_2^t)$ ) iterates of Optimistic FP are:

$$\begin{cases} y_1^t = y_1^{t-1} + Ax_2^{t-1} \\ y_2^t = y_2^{t-1} - A^\top x_1^{t-1} \end{cases} \quad \text{and} \quad \begin{cases} x_1^t = \underset{x \in \{e_i\}_m}{\text{argmax}} \langle x, y_1^t + Ax_2^{t-1} \rangle \\ x_2^t = \underset{x \in \{e_i\}_n}{\text{argmax}} \langle x, y_2^t - A^\top x_1^{t-1} \rangle \end{cases}. \quad (\text{OFP})$$

## 3 Regret Bounds for Optimistic and Alternating Fictitious Play

The main result of this paper establishes a *constant* regret bound for Optimistic Fictitious Play in two-strategy zero-sum games. Formally we prove the following theorem:

**Theorem 3.1.** Let  $A$  be a  $2 \times 2$  zero-sum game with a unique interior NE, and let  $\{(x_1^t, x_2^t)\}$  be the iterates of (OFP) on  $A$  using any tiebreaking rule. Then  $\text{Reg}(T) \leq O(1)$ .

As mentioned, this result establishes the first constant regret bounds for Fictitious Play variants in the two-player zero-sum game setting, and the result holds regardless of the tiebreaking rule used.

Moreover, this bound matches the optimal rate obtained by Optimistic FTRL variants for zero-sum games (Syrkanis et al., 2015), but notably, our proof technique departs significantly from the RVU bound approach used to obtain those results.

As a consequence of the techniques we develop for proving Theorem 3.1, we also establish a *lower bound* on the regret of *Alternating Fictitious Play*. In particular, for the corresponding *alternating* regret  $\text{Reg}^{\text{alt}}(T)$  (see Definition D.2), we prove on the  $2 \times 2$  Matching Pennies game the following:

**Theorem 3.2.** *Suppose  $x_1^1 = (p, 1 - p) \in \Delta_2$  for irrational  $p \in (3/4, 1)$ , and let  $\{x^t\}$  be the iterates of Alternating FP on (Matching Pennies) using any tiebreaking rule. Then  $\text{Reg}^{\text{alt}}(T) \geq \Omega(\sqrt{T})$ .*

To streamline the presentation of the paper, we defer the precise descriptions of the alternating play model, alternating regret, and the Alternating FP algorithm to Section D, where we also develop the proof of Theorem 3.2. Instead, in the remainder of the main text, we focus on developing the proof of Theorem 3.1. To this end, we proceed to give an overview of our techniques.

### 3.1 Intuition and Overview of Proof Techniques for Theorem 3.1

To prove Theorem 3.1, we leverage a geometric view of Optimistic Fictitious Play in the dual space of payoff vectors. We give a brief overview of this geometric perspective here:

**Energy and regret.** First, we show that the regret of the primal iterates  $\{x^t\}$  is equivalent to the growth of an *energy function* of the dual iterates  $\{y^t\}$ . Specifically, define the energy  $\Psi$  as follows:

**Definition 3.3.** Let  $y^t := (y_1^t, y_2^t)$  be the concatenated primal and dual iterates of (OFP) at time  $t \geq 1$ . Then for  $y = (y_1, y_2) \in \mathbb{R}^{m+n}$ , the energy function  $\Psi : \mathbb{R}^{m+n} \rightarrow \mathbb{R}$  is given by

$$\Psi(y) = \max_{x \in \Delta_m \times \Delta_n} \langle x, y \rangle. \quad (2)$$

In other words,  $\Psi$  is the *support function* of  $\Delta_m \times \Delta_n$ . Then by definition of  $\text{Reg}(T)$  and the payoff vectors  $\{y^t\}$ , the following relationship holds (see Section A for a proof):

**Proposition 3.4.** *Let  $\{x^t\}$  and  $\{y^t\}$  be the iterates of (OFP). Then  $\text{Reg}(T) = \Psi(y^{T+1})$ .*

Due to Proposition 3.4, it is immediate that a constant upper bound on  $\Psi(y^{T+1})$  implies a constant upper bound on  $\text{Reg}(T)$ . To this end, our main technical contribution is to prove the following upper bound on the energy  $\Psi$  under Optimistic Fictitious Play:

**Theorem 3.5.** *Assume the setting of Theorem 3.1. Let  $a_{\max} = \|A\|_{\infty}$  denote the largest entry of  $A$ , and let  $a_{\text{gap}} = \min_{(i,j),(k,\ell)} |A_{ij} - A_{k\ell}|$  denote the smallest absolute difference between two entries of  $A$ . Let  $\{y^t\}$  denote the dual iterates of (OFP) on  $A$ . Then  $\Psi(y^{T+1}) \leq 8a_{\max} \left(1 + 2\left(\frac{a_{\max}}{a_{\text{gap}}}\right)^2\right)$ .*

In other words, the energy of the dual iterates under Optimistic FP are bounded by an absolute constant that depends only on the entries of  $A$ . In Section 4, we give a technical overview of the proof of Theorem 3.5, but we first present more introduction and intuition on the geometric perspective of Optimistic Fictitious Play that is used to prove the result.

**Fictitious Play as Skew-Gradient Descent.** As shown in Abernethy et al. (2021a) and Lazarsfeld et al. (2025), in the dual space of payoff vectors, standard Fictitious Play can be viewed as a certain *skew-gradient descent* with respect to the energy  $\Psi$ . In light of this, we introduce a common geometric viewpoint that captures both standard and Optimistic FP and gives insight into their differences in energy growth, as implied by Theorem 3.5.

For this, note that the *subgradient set* of  $\Psi$  at  $y \in \mathbb{R}^{m+n}$  is given by  $\partial\Psi(y) = \arg\max_{x \in \Delta_m \times \Delta_n} \langle x, y \rangle$ . Then both standard FP and Optimistic FP can be expressed as a *skew-(sub)gradient-descent* with respect to  $\Psi$  evaluated at a *predicted* dual vector  $\tilde{y}^{t+1}$  (see Section A.3 for a full derivation):

**Proposition 3.6.** *Let  $\{y^t\}$  denote the dual iterates of either standard Fictitious Play (e.g., ( $\alpha$ -OFP) with  $\alpha = 0$ ) or Optimistic Fictitious Play. Then for all  $t \geq 1$ , the iterates of each algorithm evolve as*

$$\begin{cases} y^t = y^{t-1} + Jx^{t-1} \\ x^t \in \partial\Psi(\tilde{y}^{t+1}) \end{cases} \quad \text{where } J = \begin{pmatrix} 0 & A \\ -A^\top & 0 \end{pmatrix} \quad \text{and } \tilde{y}^{t+1} = \begin{cases} y^t & \text{for FP} \\ 2y^t - y^{t-1} & \text{for OFP} \end{cases}, \quad (3)$$

and it follows inductively that  $y^{t+1} = y^t + J\partial\Psi(\tilde{y}^{t+1})$ , where  $\partial\Psi(\tilde{y}^{t+1})$  denotes a fixed vector in the subgradient set of  $\Psi$  at  $\tilde{y}^{t+1}$ .



192 **One-step energy growth comparison of Fictitious Play variants.** For standard FP, due to its  
 193 Hamiltonian structure, the analogous skew-gradient flow in continuous-time is known to exactly  
 194 conserve  $\Psi$ , leading to constant regret (see, e.g., Mertikopoulos et al. (2018); Abernethy et al. (2021a);  
 195 Wibisono et al. (2022)). However, due to discretization, this energy conservation does not hold in  
 196 general under discrete-time Fictitious Play variants. For example, under each step of standard  
 197 Fictitious Play,  $\Psi$  is always non-decreasing. To see this, let  $\Delta\Psi(y^t) = \Psi(y^{t+1}) - \Psi(y^t)$ , and by  
 198 slight abuse of notation, let  $\partial\Psi(y)$  denote a fixed vector in the subgradient set of  $\Psi$  at  $y \in \mathbb{R}^{m+n}$ .  
 199 Then by Jensen’s inequality and skew-symmetry of  $J = -J^\top$ , it holds for all  $t \geq 1$  that

$$\text{For FP: } \Delta\Psi(y^t) \geq \langle \partial\Psi(y^t), J\partial\Psi(\tilde{y}^{t+1}) \rangle = \langle \partial\Psi(y^t), J\partial\Psi(y^t) \rangle = 0. \quad (4)$$

200 In fact, the recent upper bounds of Abernethy et al. (2021a) and Lazarsfeld et al. (2025) imply that  
 201 under FP,  $\Psi$  is *strictly* increasing by a constant in roughly  $\sqrt{T}$  iterations.

202 On the other hand, for Optimistic FP using  $\tilde{y}^{t+1} = 2y^t - y^{t-1}$ , we instead have by Jensen’s inequality:

$$\text{For Optimistic FP: } \Delta\Psi(y^t) \leq \langle \partial\Psi(y^{t+1}), J\partial\Psi(\tilde{y}^{t+1}) \rangle = \langle \partial\Psi(y^{t+1}), J\partial\Psi(\tilde{y}^{t+1}) \rangle. \quad (5)$$

203 Thus by skew-symmetry of  $J$ , expression (5) reveals that for any  $t$  where  $\partial\Psi(y^{t+1}) = \partial\Psi(\tilde{y}^{t+1})$   
 204 (e.g., true dual vector  $y^{t+1}$  and predicted dual vector  $\tilde{y}^{t+1}$  both “map” to the same primal vertex),  
 205 then the one-step energy growth  $\Delta\Psi(y^t) \leq 0$  is *non-increasing* under Optimistic FP.

206 **Challenges in establishing non-positive energy growth for OFP.** Naively, one might in general  
 207 hope the invariant  $\partial\Psi(y^{t+1}) = \partial\Psi(\tilde{y}^{t+1})$  holds at *every* timestep under Optimistic FP. However,  
 208 simple experiments reveal that this is not true: in general  $\Psi$  *can increase* during one step of the  
 209 algorithm. Thus, understanding when and why such an invariant *does* hold is still a challenging task  
 210 that may require leveraging structural properties of the payoff matrix. In the proof of Theorem 3.5, we  
 211 leverage such properties of  $2 \times 2$  games to establish sufficient conditions for when the above invariant  
 212 holds, and this subsequently leads to a constant upper bound on energy.

## 213 4 Bounded Energy Under Optimistic Fictitious Play

214 In this section, we now give a technical overview of the proof of Theorem 3.5. Throughout the proof,  
 215 we make the following assumptions on the payoff matrix  $A$ :

216 **Assumption 1.** Let  $A \in \mathbb{R}^{2 \times 2}$ . Assume that

$$A = \begin{pmatrix} a & b \\ c & d \end{pmatrix} \quad \text{where} \quad \begin{cases} \text{(i)} & \det A = ad - bc = 0 \\ \text{(ii)} & a, d > \max\{0, b, c\} \end{cases}.$$

217 As proven by Bailey and Piliouras (2019), who studied online gradient descent in  $2 \times 2$  games, for  
 218 any Fictitious Play or FTRL variant, Assumption 1 holds without loss of generality:

219 **Proposition 4.1** (Bailey and Piliouras (2019)). *Let  $A \in \mathbb{R}^{2 \times 2}$  have a unique, interior NE, and let*  
 220  *$\{x^t\}$  be the iterates of (OFP) on  $A$ . Then there exists  $\tilde{A} \in \mathbb{R}^{2 \times 2}$  satisfying Assumption 1 such that*  
 221 *(1)  $\tilde{A}$  and  $A$  have the same NE and (2) the iterates  $\{\tilde{x}^t\}$  of running (OFP) on  $\tilde{A}$  are identical to  $\{x^t\}$ .*

222 For completeness, we include a full proof of this result in Proposition 4.1 of Section B. The key  
 223 consequence of the assumption is that, under Optimistic FP, the dual payoff vectors  $y^t = (y_1^t, y_2^t) \in$   
 224  $\mathbb{R}^4$  all lie in the *same two-dimensional subspace*. Formally, we have:

225 **Proposition 4.2.** *Let  $A$  satisfy Assumption 1, and let  $\{y_1^t\}$  and  $\{y_2^t\}$  be the dual payoff vectors*  
 226 *of (OFP). Then for every  $t \geq 1$ , it holds that  $y_{12}^t = -\rho_1 \cdot y_{11}^t$  and  $y_{22}^t = -\rho_2 \cdot y_{21}^t$ , where*  
 227  *$\rho_1 := (d - c)/(a - b) > 0$  and  $\rho_2 = (d - b)/(a - c) > 0$ .*

228 The proof of Proposition 4.2 is given in Section C. Importantly, as  $\rho_1, \rho_2 > 0$ , observe that  $y_{11}^t >$   
 229  $0 \iff y_{11}^t > y_{12}^t$ , and  $y_{21}^t > 0 \iff y_{21}^t > y_{22}^t$  for all times  $t \geq 1$ . Thus, in the  $2 \times 2$  setting, the  
 230 coordinates  $y_{11}^t$  and  $y_{21}^t$  encode all information needed to analyze the iterates of Optimistic FP in (3).

231 With this in mind, the strategy for proving the upper bound on the energy  $\Psi(y^{T+1})$  is as follows:  
 232 first, leveraging the observations above, and as in Bailey and Piliouras (2019), we restrict our study  
 233 of the dual iterates  $(y_1^t, y_2^t) \in \mathbb{R}^4$  to the pair of scalar iterates  $(y_{11}^t, y_{21}^t) \in \mathbb{R}^2$ . For this, we introduce  
 234 in Section 4.1 a new set of notation to capture this lower-dimensional *subspace dynamics*, which  
 235 also naturally leads to the definition of an *equivalent energy function*. For the new, equivalent energy  
 236 function, we then prove in Section 4.2 a set of invariants that allow for establishing a uniform, constant  
 237 upper bound on the energy of the dual iterates over time.

#### 238 4.1 Subspace Dynamics of Optimistic Fictitious Play

239 We now introduce an equivalent set of primal and dual iterates  $\{w^t\}$  and  $\{z^t\}$  for (OFP), as well as a  
 240 new, equivalent energy function  $\psi$ . We will establish in Proposition 4.6 that  $\Psi(y^{T+1}) = \psi(z^{T+1})$ .

241 **Primal variables.** First, by definition of (OFP), both  $x_1^t$  and  $x_2^t$  are vertices of  $\Delta_2$ . Letting  
 242  $\mathcal{X} = \{(1, 0), (0, 1)\} \times \{(1, 0), (0, 1)\} \subset \mathbb{R}^4$  denote the vertices of the joint simplex  $\Delta_2 \times \Delta_2$ , it  
 243 follows for each  $t \geq 1$  that  $x^t \in \mathcal{X}$ . We define new primal iterates  $w^t \in \mathbb{R}^4$ , where each  $w^t$  is a  
 244 standard basis vector of  $\mathbb{R}^4$ . Let  $\mathcal{W} = \{e_1, e_2, e_3, e_4\} \subset \mathbb{R}^4$  denote this set. Then for  $t \geq 1$ , let:

$$w^t = \begin{cases} e_2 & \iff x^t = (0, 1, 1, 0) & e_3 & \iff x^t = (1, 0, 1, 0) \\ e_1 & \iff x^t = (0, 1, 0, 1) & e_4 & \iff x^t = (1, 0, 0, 1) \end{cases} \quad (6)$$

245 **Dual variables.** For each  $t \geq 0$ , let  $z_1^t = y_{11}^t \in \mathbb{R}$  and  $z_2^t = y_{21}^t \in \mathbb{R}$ . Let  $z^t = (z_1^t, z_2^t) \in \mathbb{R}^2$ .

246 **Primal-dual map.** To aid in the description and analysis of the subspace dynamics, we describe the  
 247 following partition of the dual space  $\mathbb{R}^2$ . We then describe a corresponding choice map  $Q : \mathbb{R}^2 \rightarrow \mathcal{X}$   
 248 that relates the primal and dual variables  $\{w^t\}$  and  $\{z^t\}$ .

249 **Definition 4.3.** First, let  $\mathcal{P} = \{P_1, P_2, P_3, P_4\} \subset \mathbb{R}^2$ , where each  $P_i$  is the set

$$\begin{aligned} P_2 &= \{z \in \mathbb{R}^2 : z_1 < 0 \text{ and } z_2 > 0\} & P_3 &= \{z \in \mathbb{R}^2 : z_1 > 0 \text{ and } z_2 > 0\} \\ P_1 &= \{z \in \mathbb{R}^2 : z_1 < 0 \text{ and } z_2 < 0\} & P_4 &= \{z \in \mathbb{R}^2 : z_1 > 0 \text{ and } z_2 < 0\} \end{aligned} \quad (7)$$

250 Next, let  $\tilde{\mathcal{P}} = \{P_{1\sim 2}, P_{2\sim 3}, P_{3\sim 4}, P_{4\sim 1}\} \subset \mathbb{R}^2$ , where we define

$$\begin{aligned} P_{2\sim 3} &= \{z \in \mathbb{R}^2 : z_1 = 0 \text{ and } z_2 > 0\} & P_{3\sim 4} &= \{z \in \mathbb{R}^2 : z_1 > 0 \text{ and } z_2 = 0\} \\ P_{1\sim 2} &= \{z \in \mathbb{R}^2 : z_1 < 0 \text{ and } z_2 = 0\} & P_{4\sim 1} &= \{z \in \mathbb{R}^2 : z_1 = 0 \text{ and } z_2 < 0\} \end{aligned} \quad (8)$$

251 Finally let  $\hat{\mathcal{P}} = \cup_{i \in [4]} \hat{P}_i$ , where  $\hat{P}_i = P_i \cup P_{i \sim (i+1)}$ . Observe by definition that  $\hat{\mathcal{P}} \cup \{(0, 0)\} = \mathbb{R}^2$ .

252 Note that for notational convenience, when using an index  $i \in [4]$  in the context of the sets of  
 253 Definition 4.3, we assume addition and subtraction to  $i$  are performed (mod 4) in the natural  
 254 way that maps to the set  $\{1, 2, 3, 4\}$ . For example,  $P_{i \sim (i+1)}$  is the set  $P_{4 \sim 1}$  when  $i = 4$ , and  
 255  $P_{i-2} = P_{i+2}$  is the set  $P_3$  when  $i = 1$ , etc. Figure 2 depicts the sets from Definition 4.3.

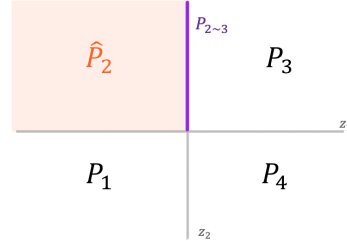

Figure 2: Examples of the sets in  $\mathcal{P}$ ,  $\tilde{\mathcal{P}}$ , and  $\hat{\mathcal{P}}$ .

260 Moreover, Definition 4.3 allows for defining a  
 261 choice map  $Q : \mathbb{R}^2 \rightarrow \mathcal{W}$  that encodes the  
 262 primal update rule of (OFP). In particular,  $Q$

263 maps dual variables  $z$  to primal vertices  $w$  depending on the membership of  $z$  in  $\mathcal{P}$  or  $\tilde{\mathcal{P}}$ . Formally:

264 **Definition 4.4.** Let  $Q : \mathbb{R}^2 \rightarrow \mathcal{W}$  be the map defined as follows: first, let  $Q((0, 0)) = e_1$ . Then

- 265 • For  $z \in \mathcal{P}$ : if  $z \in P_i$  for  $i \in [4]$ , then  $Q(z) = e_i$ .
- 266 • For  $z \in \tilde{\mathcal{P}}$ : if  $z \in P_{i \sim (i+1)}$  for  $i \in [4]$ , then  $Q(z) \in \{e_i, e_{i+1}\}$ .

267 As in the full update rule of (OFP), we assume  $Q$  encodes a tiebreaking rule to ensure  $Q(z)$  returns a  
 268 single element from  $\mathcal{W}$ . As in Remark 2.2, we make no assumptions on how such ties are broken.

269 **Primal-dual dynamics.** Using the definitions of the primal and dual variables  $\{w^t\}$  and  $\{z^t\}$  and  
 270 the choice map  $Q$ , the primal-dual dynamics of (OFP) can be rewritten as follows: for all  $t \geq 2$ , let

$$\begin{cases} z^t = z^{t-1} + S w^{t-1} \\ w^t = Q(z^t + S w^{t-1}) \end{cases} \quad \text{where } S = \begin{pmatrix} b & a & a & b \\ -c & -c & -a & -a \end{pmatrix}. \quad (9)$$

271 Observe that the  $i$ 'th column of  $S \in \mathbb{R}^{2 \times 4}$  are the entries  $(\Delta y_{11}^t, \Delta y_{12}^t)$  when  $w^t = e_i$  (cf., the  
 272 definition of  $w^t$  from expression (6)). Moreover, expression (9) implies  $S w^{t-1} = z^t - z^{t-1}$  for all

273  $t \geq 2$ . Thus, we can further describe the primal-dual dynamics of (9) solely in terms of the sequence  
 274 of dual variables  $\{z^t\}$ . In particular, for all  $t \geq 2$ , we have

$$\begin{cases} \tilde{z}^{t+1} = z^t + (z^t - z^{t-1}) \\ z^{t+1} = z^t + SQ(\tilde{z}^{t+1}) \end{cases} \quad . \quad (\text{OFP Dual})$$

275 **Energy function.** Using the new notation and dual variables  $\{z^t\}$ , we define an energy function  
 276  $\psi : \mathbb{R}^2 \rightarrow \mathbb{R}$  over the new dual space  $\mathbb{R}^2$ : let  $\psi((0, 0)) = 0$ , and for all other  $z \in \mathbb{R}^2$ , let

$$\psi(z) = \begin{cases} -\rho_1 \cdot z_1 + z_2 & \text{if } z \in \hat{P}_2, & z_1 + z_2 & \text{if } z \in \hat{P}_3, \\ -\rho_1 \cdot z_1 - \rho_2 \cdot z_2 & \text{if } z \in \hat{P}_1, & z_1 - \rho_2 \cdot z_2 & \text{if } z \in \hat{P}_4. \end{cases} \quad (10)$$

277 It is also more expressive to write  $\psi$  using the choice map  $Q$  from Definition 4.4. Recall for any  
 278  $z \in \mathbb{R}^2$  that  $Q(z) \in \mathcal{W} = \{e_1, e_2, e_3, e_4\}$ . Then we have the following equivalent definition of  $\psi$ :

279 **Definition 4.5.** For  $z \in \mathbb{R}^2$ , the function  $\psi : \mathbb{R}^2 \rightarrow \mathbb{R}$  is given by

$$\psi(z) = \langle z, MQ(z) \rangle \quad \text{where} \quad M = \begin{pmatrix} -\rho_1 & -\rho_1 & 1 & 1 \\ -\rho_2 & 1 & 1 & -\rho_2 \end{pmatrix}. \quad (11)$$

280 Due to the relationship between the coordinates of  $y_1^t$  and  $y_2^t$  from Proposition 4.2, the following  
 281 relationship between  $\Psi$  and  $\psi$  (and by Proposition 3.4, between  $\Psi$  and  $\text{Reg}(T)$ ), is immediate:

282 **Proposition 4.6.** For all  $t \geq 1$ ,  $\Psi(y^t) = \psi(z^t)$ . Moreover,  $\text{Reg}(T) = \Psi(y^{T+1}) = \psi(z^{T+1})$ .

## 283 4.2 Bounded Energy of Subspace Dynamics

284 Leveraging Proposition 4.6, it suffices to derive an upper bound on  $\psi(z^{T+1})$  in order to prove  
 285 Theorem 3.5. For this, the key step is to prove a set of invariants on the dual iterates which establish  
 286 that, if the magnitude of  $\psi$  ever exceeds some constant threshold, the subsequent one-step change in  
 287  $\psi$  is non-increasing (thus crystalizing the intuition from expression (5)).

288 For this, we first define an absolute constant  $B$  as follows:

289 **Definition 4.7.** Fix  $A$  satisfying Assumption 1, and recall  $a_{\max} = \|A\|_{\infty}$ . Then define  $B > 0$  by

$$B = \min \{b \in \mathbb{R}_+ : \text{for all } z \in \mathbb{R}^2, \|z\|_1 \leq 6a_{\max} \implies \psi(z) \leq b\}.$$

290 In words,  $B$  is the smallest constant whose sublevel set  $\psi(z) \leq B$  contains an  $\ell_1$  ball of radius  $6a_{\max}$ .  
 291 Moreover, the magnitude of  $B$  can be bounded from above as follows (see Section C for the proof):

292 **Proposition 4.8.** Let  $B$  be the constant from Definition 4.7. Then  $B \leq 6a_{\max}(1 + \rho_1 + \rho_2)$ .

293 **Worst-case upper bound on energy.** Observe that if  $\psi(z^t) \leq B$  for all times  $t$ , then the statement  
 294 of Theorem 3.5 trivially holds. On the other hand, if the energy  $\psi$  crosses this threshold under one  
 295 step of the dynamics, then we have the following constant upper bound on  $\psi(z^{t+1})$ :

296 **Lemma 4.9.** Suppose  $\psi(z^t) \leq B$ , and let  $B' = 8a_{\max}(1 + \rho_1 + \rho_2)^2$ . Then  $\psi(z^{t+1}) \leq B'$

297 **Cycling invariants and controlled energy growth.** The remaining step is to then control the  
 298 energy growth whenever  $\psi(z^t) > B$ . For this, we prove the following key lemma:

299 **Lemma 4.10.** Suppose  $\psi(z^t) > B$  and  $z^t \in \hat{P}_i$  for  $i \in [4]$ . Then the following hold:

- 300 (1) Either (i)  $\tilde{z}^{t+1}, z^{t+1} \in \hat{P}_i$  or (ii)  $\tilde{z}^{t+1}, z^{t+1} \in P_{i+1}$   
 301 (2)  $\Delta\psi(z^t) = \psi(z^{t+1}) - \psi(z^t) \leq 0$ .

302 Part (1) of the lemma establishes invariants relating the true payoff vectors and predicted payoff  
 303 vectors whenever energy is above the threshold  $B$ . Roughly speaking, when  $\psi$  is larger than  $B$ , the  
 304 dual vectors cycle consecutively through the regions  $\hat{P}_1, \dots, \hat{P}_4$  (similarly to the iterates of standard  
 305 Fictitious Play), and this roughly implies that  $Q(\tilde{z}^{t+1}) = Q(z^{t+1})$ .



Importantly, this alignment between  $z^{t+1}$  and  $\tilde{z}^{t+1}$  is the key step needed to establish a non-increasing change in energy, as stated in part (2). To see why this is true, observe that using the definition of  $\psi$  from (11), we can compute the one-step change  $\Delta\psi(z^t) = \psi(z^{t+1}) - \psi(z^t)$  under (OPF Dual) as

$$\Delta\psi(z^t) = \langle z^{t+1}, MQ(z^{t+1}) \rangle - \langle z^t, MQ(z^t) \rangle \quad (12)$$

$$= \langle z^t + SQ(\tilde{z}^{t+1}), MQ(z^{t+1}) \rangle - \langle z^t, MQ(z^t) \rangle \quad (13)$$

$$= \underbrace{\langle z^t, M(Q(z^{t+1}) - Q(z^t)) \rangle}_{(a)} + \underbrace{\langle Q(\tilde{z}^{t+1}), S^\top MQ(z^{t+1}) \rangle}_{(b)}. \quad (14)$$

Here, (14) essentially encodes the expression for  $\Delta\Psi$  from (5). In particular, straightforward calculations show that the matrix  $S^\top M$  is skew-symmetric, and as Part (1) of the lemma roughly implies  $Q(z^{t+1}) = Q(\tilde{z}^{t+1})$ , term (b) of (14) vanishes. Together with the column structure of  $M$ , the invariants of part (1) imply that part (a) of (14) is non-positive, and thus overall  $\Delta\psi(z^t) \leq 0$ .

The full proofs of the preceding lemmas are developed in Section C and account more carefully for boundary conditions and tiebreaking. Figure 3 of Section C.3 also gives more visual intuition for the invariants and energy-growth behavior of Lemma 4.10. Granting these lemmas as true for now, we then give the proof of Theorem 3.5:

**Proof of Theorem 3.5.** Suppose for  $t > 0$  that  $\psi(z^{t-1}) \leq B$  and  $\psi(z^t) > B$ . By Lemma 4.9, we must have  $\psi(z^t) \leq 8a_{\max}(1 + \rho_1 + \rho_2)^2$ . Moreover, Lemmas C.2 and C.6 together imply that  $\Delta\psi(z^t) \leq 0$ , and thus also  $\psi(z^{t+1}) \leq 8a_{\max}(1 + \rho_1 + \rho_2)^2$ . It follows inductively that  $\psi(z^{T+1}) \leq 8a_{\max}(1 + \rho_1 + \rho_2)^2$ . By definition,  $\rho_1, \rho_2 \leq (a_{\max}/a_{\text{gap}})$ , and thus we conclude

$$\psi(z^{T+1}) = \Psi(y^{T+1}) \leq 8a_{\max}(1 + 2(a_{\max}/a_{\text{gap}}))^2. \quad \square$$

## 5 Discussion and Conclusion

In this work, we established for the first time that the *unregularized* Optimistic Fictitious Play algorithm can obtain *constant*  $O(1)$  regret in two-player zero-sum games. Our proof technique leverages a geometric viewpoint of Fictitious Play algorithms, and we believe the techniques established for the  $2 \times 2$  regime can be extended to higher dimensions.

**Additional experimental results.** To this end, in Table 2 we present additional experimental evidence indicating that constant regret bounds for Optimistic FP (similar to Theorem 3.1) hold more generally in higher-dimensional settings. The table shows the empirical regret of Optimistic FP and standard FP (using lexicographical tiebreaking) on three classes of zero-sum games, in three higher dimensional settings. For each setting, the algorithms were run from 100 random initializations, each for  $T = 10000$  iterations, and we report the average regret over all initializations.

| Dimension:      | 15×15       |           | 25×25       |            | 50×50       |            |
|-----------------|-------------|-----------|-------------|------------|-------------|------------|
| Payoff Matrix ↓ | FP          | OFP       | FP          | OFP        | FP          | OFP        |
| Identity        | 155.1 ± 3.9 | 8.1 ± 1.6 | 161.3 ± 3.1 | 12.5 ± 1.7 | 167.2 ± 2.5 | 25.2 ± 2.1 |
| RPS             | 235.6 ± 7.6 | 2.9 ± 0.5 | 242.2 ± 6.3 | 2.9 ± 0.9  | 242.7 ± 5.9 | 2.5 ± 0.8  |
| Random [0, 1]   | 116.2 ± 5.8 | 4.3 ± 0.8 | 118.6 ± 5.7 | 5.7 ± 0.9  | 177.0 ± 6.5 | 13.0 ± 1.5 |

Table 2: Empirical regret of FP and OFP using lexicographical tiebreaking. Each entry reports an average and standard deviation (over 100 random initializations) of total regret after  $T = 10000$  steps.

331

The results indicate that, in each class of payoff matrix and in each dimension, Optimistic FP has only constant regret compared to the regret of roughly  $\sqrt{T} \approx 100$  obtained by standard FP. In Table 3 of Section E, we also report results using *randomized tiebreaking* for both algorithms and find similar conclusions, thus highlighting the robustness of the constant regret of OFP to tiebreaking rules. In Section E, we give more details on the experimental setup and additional plots similar to Figure 1.

**Limitations.** Formally proving a constant regret bound for Optimistic Fictitious Play in all zero-sum games remains an important open question.

**Broader impact.** We acknowledge that there are many potential societal consequences of our theoretical results, however none of which we feel must be specifically highlighted.

## References

- Abernethy, J., Lai, K. A., and Wibisono, A. (2021a). Fast convergence of fictitious play for diagonal payoff matrices. In *Proceedings of the 2021 ACM-SIAM Symposium on Discrete Algorithms (SODA)*, pages 1387–1404. SIAM.
- Abernethy, J. D., Lai, K. A., Levy, K. Y., and Wang, J. (2018). Faster rates for convex-concave games. In Bubeck, S., Perchet, V., and Rigollet, P., editors, *Conference On Learning Theory, COLT 2018, Stockholm, Sweden, 6-9 July 2018*, volume 75 of *Proceedings of Machine Learning Research*, pages 1595–1625. PMLR.
- Abernethy, J. D., Lai, K. A., and Wibisono, A. (2021b). Last-iterate convergence rates for min-max optimization: Convergence of hamiltonian gradient descent and consensus optimization. In Feldman, V., Ligett, K., and Sabato, S., editors, *Algorithmic Learning Theory, 16-19 March 2021, Virtual Conference, Worldwide*, volume 132 of *Proceedings of Machine Learning Research*, pages 3–47. PMLR.
- Anagnostides, I., Daskalakis, C., Farina, G., Fishelson, M., Golowich, N., and Sandholm, T. (2022a). Near-optimal no-regret learning for correlated equilibria in multi-player general-sum games. In *Proceedings of the 54th Annual ACM SIGACT Symposium on Theory of Computing*, pages 736–749.
- Anagnostides, I., Farina, G., Kroer, C., Lee, C., Luo, H., and Sandholm, T. (2022b). Uncoupled learning dynamics with  $O(\log T)$  swap regret in multiplayer games. In Koyejo, S., Mohamed, S., Agarwal, A., Belgrave, D., Cho, K., and Oh, A., editors, *Advances in Neural Information Processing Systems 35: Annual Conference on Neural Information Processing Systems 2022, NeurIPS 2022, New Orleans, LA, USA, November 28 - December 9, 2022*.
- Anagnostides, I., Panageas, I., Farina, G., and Sandholm, T. (2022c). On last-iterate convergence beyond zero-sum games. In Chaudhuri, K., Jegelka, S., Song, L., Szepesvári, C., Niu, G., and Sabato, S., editors, *International Conference on Machine Learning, ICML 2022, 17-23 July 2022, Baltimore, Maryland, USA*, volume 162 of *Proceedings of Machine Learning Research*, pages 536–581. PMLR.
- Bailey, J. and Piliouras, G. (2019). Fast and furious learning in zero-sum games: Vanishing regret with non-vanishing step sizes. *Advances in Neural Information Processing Systems*, 32.
- Bailey, J. P., Gidel, G., and Piliouras, G. (2020). Finite regret and cycles with fixed step-size via alternating gradient descent-ascent. In *Conference on Learning Theory*, pages 391–407. PMLR.
- Baudin, L. and Laraki, R. (2022). Fictitious play and best-response dynamics in identical interest and zero-sum stochastic games. In Chaudhuri, K., Jegelka, S., Song, L., Szepesvári, C., Niu, G., and Sabato, S., editors, *International Conference on Machine Learning, ICML 2022, 17-23 July 2022, Baltimore, Maryland, USA*, volume 162 of *Proceedings of Machine Learning Research*, pages 1664–1690. PMLR.
- Beaglehole, D., Hopkins, M., Kane, D., Liu, S., and Lovett, S. (2023). Sampling equilibria: Fast no-regret learning in structured games. In Bansal, N. and Nagarajan, V., editors, *Proceedings of the 2023 ACM-SIAM Symposium on Discrete Algorithms, SODA 2023, Florence, Italy, January 22-25, 2023*, pages 3817–3855. SIAM.
- Brown, G. W. (1951). Iterative solution of games by fictitious play. *Act. Anal. Prod Allocation*, 13(1):374.
- Cai, Y., Farina, G., Grand-Clément, J., Kroer, C., Lee, C., Luo, H., and Zheng, W. (2025a). Last-iterate convergence properties of regret-matching algorithms in games. In *The Thirteenth International Conference on Learning Representations, ICLR 2025, Singapore, April 24-28, 2025*. OpenReview.net.
- Cai, Y., Farina, G., Grand-Clément, J., Kroer, C., Lee, C., Luo, H., and Zheng, W. (2025b). On separation between best-iterate, random-iterate, and last-iterate convergence of learning in games. *CoRR*, abs/2503.02825.

389 Cai, Y., Farina, G., Grand-Clément, J., Kroer, C., Lee, C.-W., Luo, H., and Zheng, W. (2024).  
390 Fast last-iterate convergence of learning in games requires forgetful algorithms. *arXiv preprint*  
391 *arXiv:2406.10631*.

392 Cai, Y., Oikonomou, A., and Zheng, W. (2022). Finite-time last-iterate convergence for learning  
393 in multi-player games. In Koyejo, S., Mohamed, S., Agarwal, A., Belgrave, D., Cho, K., and  
394 Oh, A., editors, *Advances in Neural Information Processing Systems 35: Annual Conference on*  
395 *Neural Information Processing Systems 2022, NeurIPS 2022, New Orleans, LA, USA, November*  
396 *28 - December 9, 2022*.

397 Candogan, O., Ozdaglar, A. E., and Parrilo, P. A. (2013). Dynamics in near-potential games. *Games*  
398 *Econ. Behav.*, 82:66–90.

399 Cevher, V., Cutkosky, A., Kavis, A., Piliouras, G., Skoulakis, S., and Viano, L. (2023). Alternation  
400 makes the adversary weaker in two-player games. *Advances in Neural Information Processing*  
401 *Systems*, 36:18263–18290.

402 Chen, X. and Peng, B. (2020). Hedging in games: Faster convergence of external and swap regrets.  
403 *Advances in Neural Information Processing Systems*, 33:18990–18999.

404 Chotibut, T., Falniowski, F., Misiurewicz, M., and Piliouras, G. (2021). Family of chaotic maps from  
405 game theory. *Dynamical Systems*, 36(1):48–63.

406 Daskalakis, C., Fishelson, M., and Golowich, N. (2021). Near-optimal no-regret learning in general  
407 games. In Ranzato, M., Beygelzimer, A., Dauphin, Y. N., Liang, P., and Vaughan, J. W., editors,  
408 *Advances in Neural Information Processing Systems 34: Annual Conference on Neural Information*  
409 *Processing Systems 2021, NeurIPS 2021, December 6-14, 2021, virtual*, pages 27604–27616.

410 Daskalakis, C. and Pan, Q. (2014). A counter-example to Karlin’s strong conjecture for fictitious play.  
411 In *2014 IEEE 55th Annual Symposium on Foundations of Computer Science*, pages 11–20. IEEE.

412 Daskalakis, C. and Panageas, I. (2019). Last-iterate convergence: Zero-sum games and constrained  
413 min-max optimization. In Blum, A., editor, *10th Innovations in Theoretical Computer Science*  
414 *Conference, ITCS 2019, January 10-12, 2019, San Diego, California, USA*, volume 124 of *LIPIcs*,  
415 pages 27:1–27:18. Schloss Dagstuhl - Leibniz-Zentrum für Informatik.

416 Farina, G., Anagnostides, I., Luo, H., Lee, C., Kroer, C., and Sandholm, T. (2022). Near-optimal  
417 no-regret learning dynamics for general convex games. In Koyejo, S., Mohamed, S., Agarwal, A.,  
418 Belgrave, D., Cho, K., and Oh, A., editors, *Advances in Neural Information Processing Systems 35:*  
419 *Annual Conference on Neural Information Processing Systems 2022, NeurIPS 2022, New Orleans,*  
420 *LA, USA, November 28 - December 9, 2022*.

421 Fasoulakis, M., Markakis, E., Pantazis, Y., and Varsos, C. (2022). Forward looking best-response  
422 multiplicative weights update methods for bilinear zero-sum games. In Camps-Valls, G., Ruiz,  
423 F. J. R., and Valera, I., editors, *International Conference on Artificial Intelligence and Statistics,*  
424 *AISTATS 2022, 28-30 March 2022, Virtual Event*, volume 151 of *Proceedings of Machine Learning*  
425 *Research*, pages 11096–11117. PMLR.

426 Gidel, G., Hemmat, R. A., Pezeshki, M., Le Priol, R., Huang, G., Lacoste-Julien, S., and Mitliagkas, I.  
427 (2019). Negative momentum for improved game dynamics. In *The 22nd International Conference*  
428 *on Artificial Intelligence and Statistics*, pages 1802–1811. PMLR.

429 Hait, S., Li, P., Luo, H., and Zhang, M. (2025). Alternating regret for online convex optimization.  
430 *Conference on Learning Theory (COLT 2025)*.

431 Heinrich, J., Lanctot, M., and Silver, D. (2015). Fictitious self-play in extensive-form games. In  
432 *International Conference on Machine Learning*, pages 805–813. PMLR.

433 Hsieh, Y., Antonakopoulos, K., Cevher, V., and Mertikopoulos, P. (2022). No-regret learning in  
434 games with noisy feedback: Faster rates and adaptivity via learning rate separation. In Koyejo,  
435 S., Mohamed, S., Agarwal, A., Belgrave, D., Cho, K., and Oh, A., editors, *Advances in Neural*  
436 *Information Processing Systems 35: Annual Conference on Neural Information Processing Systems*  
437 *2022, NeurIPS 2022, New Orleans, LA, USA, November 28 - December 9, 2022*.

438 Hsieh, Y., Iutzeler, F., Malick, J., and Mertikopoulos, P. (2020). Explore aggressively, update  
439 conservatively: Stochastic extragradient methods with variable stepsize scaling. In Larochelle,  
440 H., Ranzato, M., Hadsell, R., Balcan, M., and Lin, H., editors, *Advances in Neural Information  
441 Processing Systems 33: Annual Conference on Neural Information Processing Systems 2020,  
442 NeurIPS 2020, December 6-12, 2020, virtual*.

443 Katona, J., Wang, X., and Wibisono, A. (2024). A symplectic analysis of alternating mirror descent.  
444 *arXiv preprint arXiv:2405.03472*.

445 Lazarsfeld, J., Piliouras, G., Sim, R., and Wibisono, A. (2025). Fast and furious symmetric learning  
446 in zero-sum games: Gradient descent as fictitious play. *Conference on Learning Theory (COLT  
447 2025)*.

448 Mertikopoulos, P., Papadimitriou, C., and Piliouras, G. (2018). Cycles in adversarial regularized  
449 learning. In *Proceedings of the twenty-ninth annual ACM-SIAM symposium on discrete algorithms*,  
450 pages 2703–2717. SIAM.

451 Monderer, D. and Shapley, L. S. (1996). Potential games. *Games and economic behavior*, 14(1):124–  
452 143.

453 Panageas, I., Patrís, N., Skoulakis, S., and Cevher, V. (2023). Exponential lower bounds for fictitious  
454 play in potential games. In Oh, A., Naumann, T., Globerson, A., Saenko, K., Hardt, M., and  
455 Levine, S., editors, *Advances in Neural Information Processing Systems 36: Annual Conference on  
456 Neural Information Processing Systems 2023, NeurIPS 2023, New Orleans, LA, USA, December  
457 10 - 16, 2023*.

458 Piliouras, G., Sim, R., and Skoulakis, S. (2022). Beyond time-average convergence: Near-optimal  
459 uncoupled online learning via clairvoyant multiplicative weights update. *Advances in Neural  
460 Information Processing Systems*, 35:22258–22269.

461 Rakhlin, S. and Sridharan, K. (2013). Optimization, learning, and games with predictable sequences.  
462 *Advances in Neural Information Processing Systems*, 26.

463 Robinson, J. (1951). An iterative method of solving a game. *Annals of Mathematics*, 54(2):296–301.

464 Sayin, M. O., Parise, F., and Ozdaglar, A. E. (2022). Fictitious play in zero-sum stochastic games.  
465 *SIAM J. Control. Optim.*, 60(4):2095–2114.

466 Shalev-Shwartz, S. et al. (2012). Online learning and online convex optimization. *Foundations and  
467 Trends® in Machine Learning*, 4(2):107–194.

468 Syrgkanis, V., Agarwal, A., Luo, H., and Schapire, R. E. (2015). Fast convergence of regularized  
469 learning in games. *Advances in Neural Information Processing Systems*, 28.

470 Vinyals, O., Babuschkin, I., Czarnecki, W. M., Mathieu, M., Dudzik, A., Chung, J., Choi, D. H.,  
471 Powell, R., Ewalds, T., Georgiev, P., et al. (2019). Grandmaster level in starcraft ii using multi-agent  
472 reinforcement learning. *nature*, 575(7782):350–354.

473 Wang, J.-K. and Abernethy, J. D. (2018). Acceleration through optimistic no-regret dynamics. In  
474 Bengio, S., Wallach, H., Larochelle, H., Grauman, K., Cesa-Bianchi, N., and Garnett, R., editors,  
475 *Advances in Neural Information Processing Systems*, volume 31. Curran Associates, Inc.

476 Wibisono, A., Tao, M., and Piliouras, G. (2022). Alternating mirror descent for constrained min-max  
477 games. *Advances in Neural Information Processing Systems*, 35:35201–35212.

478 Zhang, B. H., Anagnostides, I., Farina, G., and Sandholm, T. (2024). Efficient  $\phi$ -regret mini-  
479 mization with low-degree swap deviations in extensive-form games. In Globersons, A., Mackey,  
480 L., Belgrave, D., Fan, A., Paquet, U., Tomczak, J. M., and Zhang, C., editors, *Advances in Neural  
481 Information Processing Systems 38: Annual Conference on Neural Information Processing Systems  
482 2024, NeurIPS 2024, Vancouver, BC, Canada, December 10 - 15, 2024*.

## 483 Table of Contents

|     |                                                                                              |           |
|-----|----------------------------------------------------------------------------------------------|-----------|
| 484 | <b>1 Introduction</b>                                                                        | <b>1</b>  |
| 485 | 1.1 Our Contributions . . . . .                                                              | 2         |
| 486 | 1.2 Other Related Work . . . . .                                                             | 3         |
| 487 | <b>2 Preliminaries</b>                                                                       | <b>3</b>  |
| 488 | 2.1 Online Learning in Zero-Sum Games . . . . .                                              | 3         |
| 489 | 2.2 Fictitious Play and Optimistic Fictitious Play . . . . .                                 | 4         |
| 490 | <b>3 Regret Bounds for Optimistic and Alternating Fictitious Play</b>                        | <b>4</b>  |
| 491 | 3.1 Intuition and Overview of Proof Techniques for Theorem 3.1 . . . . .                     | 5         |
| 492 | <b>4 Bounded Energy Under Optimistic Fictitious Play</b>                                     | <b>6</b>  |
| 493 | 4.1 Subspace Dynamics of Optimistic Fictitious Play . . . . .                                | 7         |
| 494 | 4.2 Bounded Energy of Subspace Dynamics . . . . .                                            | 8         |
| 495 | <b>5 Discussion and Conclusion</b>                                                           | <b>9</b>  |
| 496 | <b>A Details on Regret, Energy, and Fictitious Play</b>                                      | <b>14</b> |
| 497 | A.1 Zero-Sum Games and Convergence to Nash Equilibrium . . . . .                             | 14        |
| 498 | A.2 Proof of Proposition 3.4 . . . . .                                                       | 14        |
| 499 | A.3 Details on Fictitious Play Variants as Skew-Gradient Descent . . . . .                   | 14        |
| 500 | <b>B Assumptions on Payoff Matrix</b>                                                        | <b>15</b> |
| 501 | B.1 Proof of Proposition 4.1 . . . . .                                                       | 15        |
| 502 | B.2 Proof of Proposition 4.2 . . . . .                                                       | 16        |
| 503 | <b>C Proofs for Optimistic Fictitious Play Regret Upper Bound</b>                            | <b>17</b> |
| 504 | C.1 Properties of the Energy Threshold $B$ . . . . .                                         | 17        |
| 505 | C.2 Energy Upper Bound: Proof of Lemma 4.9 . . . . .                                         | 18        |
| 506 | C.3 Cycling Invariants and Non-Increasing Energy Growth: Proof of Lemma 4.10 . . . . .       | 18        |
| 507 | <b>D Proofs for Alternating Fictitious Play Regret Lower Bound</b>                           | <b>21</b> |
| 508 | D.1 Details on Alternating Play and Alternating Regret . . . . .                             | 21        |
| 509 | D.2 Details on Alternating Fictitious Play . . . . .                                         | 23        |
| 510 | D.3 Proof of Theorem 3.2: Regret Lower Bound on Matching Pennies . . . . .                   | 23        |
| 511 | <b>E Additional Experimental Results</b>                                                     | <b>26</b> |
| 512 | E.1 Details on Experimental Setup . . . . .                                                  | 26        |
| 513 | E.2 Empirical Regret Comparisons of Fictitious Play and Optimistic Fictitious Play . . . . . | 27        |



## A Details on Regret, Energy, and Fictitious Play

### A.1 Zero-Sum Games and Convergence to Nash Equilibrium

**Proposition 2.1.** Let  $\tilde{x}_1^T = \frac{1}{T}(\sum_{t=0}^T x_1^t)$  and  $\tilde{x}_2^T = \frac{1}{T}(\sum_{t=0}^T x_2^t)$  denote the time-average iterates of Players 1 and 2, respectively, and suppose  $\text{Reg}(T) = o(T)$ . Then  $(\tilde{x}_1^T, \tilde{x}_2^T)$  converges (in duality-gap) to an NE of  $A$  at a rate of  $\text{Reg}(T)/T = o(1)$ .

*Proof.* By definition of  $\text{Reg}(T)$  from (1), we have that

$$\frac{\text{Reg}(T)}{T} = \max_{x \in \Delta_m} \langle x, A \left( \frac{1}{T} \sum_{t=0}^T x_2^t \right) \rangle - \min_{x \in \Delta_n} \langle x, A^\top \left( \frac{1}{T} \sum_{t=0}^T x_1^t \right) \rangle = \text{DG}(\tilde{x}_1^T, \tilde{x}_2^T),$$

where we use the definitions of  $\tilde{x}_1^T$  and  $\tilde{x}_2^T$ , and of the duality gap  $\text{DG}(\cdot, \cdot)$ . Thus if  $\text{Reg}(T) = o(\sqrt{T})$ ,

then  $\text{DG}(\tilde{x}_1^T, \tilde{x}_2^T) = \frac{\text{Reg}(T)}{T} = o(1)$ .  $\square$

### A.2 Proof of Proposition 3.4

In this section, we prove Proposition 3.4, which shows the equivalence between energy and regret. Restated here:

**Proposition 3.4.** Let  $\{x^t\}$  and  $\{y^t\}$  be the iterates of (OFP). Then  $\text{Reg}(T) = \Psi(y^{T+1})$ .

*Proof.* For convenience, we let  $d = m + n$ , and we write  $\mathcal{X} = \Delta_m \times \Delta_n$ . Then recall from Definition 3.3 that for all  $y \in \mathbb{R}^d$ , the energy function  $\Psi : \mathbb{R}^d \rightarrow \mathbb{R}$  is given by

$$\Psi(y) = \max_{x=(x_1, x_2) \in \mathcal{X}} \langle x, y \rangle \quad (15)$$

for  $y = (y_1, y_2) \in \mathbb{R}^d$ . Using the definitions of regret from (1) and of the dual variables from Definition 2.3, we have

$$\begin{aligned} \text{Reg}(T) &= \max_{x_1 \in \Delta_m} \left\langle x_1, \sum_{t=1}^T A x_2^t \right\rangle - \min_{x_1 \in \Delta_n} \left\langle x_2, \sum_{t=1}^T A^\top x_1^t \right\rangle \\ &= \max_{x_1 \in \Delta_m} \langle x_1, y_1^{T+1} \rangle + \max_{x_2 \in \Delta_n} \langle x_2, y_2^{T+1} \rangle \\ &= \max_{x=(x_1, x_2) \in \mathcal{X}} \langle x, y^{T+1} \rangle \\ &= \Psi(y^{T+1}). \end{aligned} \quad \square$$

### A.3 Details on Fictitious Play Variants as Skew-Gradient Descent

In this section, we give more details on the geometric viewpoint of Optimistic FP and standard FP introduced in Section 3.

**Dual dynamics of fictitious play variants.** First, we recall that for a convex function  $H : \mathbb{R}^d \rightarrow \mathbb{R}$  that its subgradient set at  $y \in \mathbb{R}^d$  is defined as

$$\partial H(y) = \{g \in \mathbb{R}^d : \forall z \in \mathbb{R}^d, H(z) \geq H(y) + \langle g, z - y \rangle\}. \quad (16)$$

Let  $d = m + n$ . Then for the energy function  $\Psi$  from Definition 3.3, it follows that, for any  $y \in \mathbb{R}^d$ , the subgradient set  $\partial \Psi(y)$  is the set of maximizers  $\partial \Psi(y) = \arg\max_{x \in \Delta_m \times \Delta_n} \langle x, y \rangle$ . The next proposition (originally stated in Section 3) then follows by (1) using the definition of standard ( $\alpha = 0$ ) and Optimistic FP ( $\alpha = 1$ ) from ( $\alpha$ -OFP), and (2) by the definition of the dual payoff vectors.

**Proposition 3.6.** Let  $\{y^t\}$  denote the dual iterates of either standard Fictitious Play (e.g., ( $\alpha$ -OFP) with  $\alpha = 0$ ) or Optimistic Fictitious Play. Then for all  $t \geq 1$ , the iterates of each algorithm evolve as

$$\begin{cases} y^t = y^{t-1} + J x^{t-1} \\ x^t \in \partial \Psi(\tilde{y}^{t+1}) \end{cases} \quad \text{where } J = \begin{pmatrix} 0 & A \\ -A^\top & 0 \end{pmatrix} \quad \text{and } \tilde{y}^{t+1} = \begin{cases} y^t & \text{for FP} \\ 2y^t - y^{t-1} & \text{for OFP} \end{cases}, \quad (3)$$

and it follows inductively that  $y^{t+1} = y^t + J \partial \Psi(\tilde{y}^{t+1})$ , where  $\partial \Psi(\tilde{y}^{t+1})$  denotes a fixed vector in the subgradient set of  $\Psi$  at  $\tilde{y}^{t+1}$ .

543 **One-step energy growth of FP variants.** Using Proposition 3.6, we can then derive the bounds on  
 544 the one-step energy growth under FP and Optimistic FP, as stated in expressions (4) and (5).

545 For standard FP, using the convexity of  $\Psi$  and Jensen's inequality (equivalently, the subgradient  
 546 definition from (16)), and letting  $\partial\Psi(y)$  denote a fixed vector in the subgradient set of  $\Psi$  at  $y$ , we  
 547 have for all  $t \geq 1$

$$\begin{aligned}\Delta\Psi(y^t) &= \Psi(y^{t+1}) - \Psi(y^t) \geq \langle \partial\Psi(y^t), y^{t+1} - y^t \rangle \\ &= \langle \partial\Psi(y^t), J\partial\Psi(\tilde{y}^{t+1}) \rangle = \langle \partial\Psi(y^t), J\partial\Psi(y^t) \rangle = 0.\end{aligned}$$

548 Here, the first two equalities follow by the inductive update rule for FP from Proposition 3.6, and the  
 549 final equality follows by skew-symmetry of  $J = -J^\top$  (since  $\langle y, Jy \rangle = 0$  for all  $y \in \mathbb{R}^d$ ).

550 For Optimistic FP, again using the subgradient definition of expression (16), we have for  $t \geq 1$ :

$$\begin{aligned}\Delta\Psi(y^t) &= \Psi(y^{t+1}) - \Psi(y^t) \leq \langle \partial\Psi(y^{t+1}), y^{t+1} - y^t \rangle \\ &= \langle \partial\Psi(y^{t+1}), J\partial\Psi(\tilde{y}^{t+1}) \rangle,\end{aligned}$$

551 where the equality uses the update rule from Proposition 3.6 for Optimistic FP. Thus, by the skew-  
 552 symmetry of  $J$ , and as explained in Section 3, the energy growth  $\Delta\Psi(y^t)$  for Optimistic FP is  
 553 non-positive whenever

$$\partial\Psi(y^{t+1}) = \partial\Psi(\tilde{y}^{t+1}) = \partial\Psi(2y^t - y^{t-1}).$$

## 554 B Assumptions on Payoff Matrix

555 Recall from Section 4 that in the proof of Theorem 3.5 for the  $2 \times 2$  setting, we make the following  
 556 assumption on the entries of the payoff matrix:

557 **Assumption 1.** Let  $A \in \mathbb{R}^{2 \times 2}$ . Assume that

$$A = \begin{pmatrix} a & b \\ c & d \end{pmatrix} \quad \text{where} \quad \begin{cases} \text{(i)} & \det A = ad - bc = 0 \\ \text{(ii)} & a, d > \max\{0, b, c\} \end{cases}.$$

558 In this section, we give the proofs of Proposition 4.1 and Proposition 4.2. Proposition 4.1 establishes  
 559 that the conditions of Assumption 1 hold without loss of generality, and Proposition 4.2 derives the  
 560 resulting subspace invariance property of the payoff vectors under  $A$ .

### 561 B.1 Proof of Proposition 4.1

562 We restate the proposition here:

563 **Proposition 4.1 (Bailey and Piliouras (2019)).** Let  $A \in \mathbb{R}^{2 \times 2}$  have a unique, interior NE, and let  
 564  $\{x^t\}$  be the iterates of (OFP) on  $A$ . Then there exists  $\tilde{A} \in \mathbb{R}^{2 \times 2}$  satisfying Assumption 1 such that  
 565 (1)  $\tilde{A}$  and  $A$  have the same NE and (2) the iterates  $\{\tilde{x}^t\}$  of running (OFP) on  $\tilde{A}$  are identical to  $\{x^t\}$ .

566 The proof of Proposition 4.1 follows from the arguments in Bailey and Piliouras (2019, Appendix D).  
 567 For completeness, we re-derive the full proof here.

568 *Proof.* Fix  $A$ , and let  $(x_1^*, x_2^*) \in \Delta_2 \times \Delta_2$  denote its unique, interior equilibrium. Then the  
 569 coordinates of  $x_1^*$  and  $x_2^*$  are given by

$$x_1^* = \left( \frac{d-c}{a+d-(b+c)}, \frac{a-b}{a+d-(b+c)} \right) \quad x_2^* = \left( \frac{d-b}{a+d-(b+c)}, \frac{a-c}{a+d-(b+c)} \right). \quad (17)$$

570 Suppose that  $A$  does not satisfy the conditions of Assumption 1. We will then construct  $\tilde{A} \in \mathbb{R}^{2 \times 2}$   
 571 that both satisfies the assumption, and such that the two claims of the proposition statement hold.

572 For this, suppose that the entries of  $A$  are shifted by the same additive constant  $c$ , and define the best  
 573 responses  $v$  and  $v'$

$$v := \operatorname{argmax}_{e_i \in \{e_1, e_2\}} \langle e_i, Ax \rangle \quad (18)$$

$$v' := \operatorname{argmax}_{e_i \in \{e_1, e_2\}} \langle e_i, (A + c\mathbf{1})x \rangle = \operatorname{argmax}_{e_i \in \{e_1, e_2\}} \langle e_i, Ax \rangle + c, \quad (19)$$

where  $x \in \Delta_2$  and  $\mathbf{1} \in \mathbb{R}^{2 \times 2}$  is the matrix of all ones. Thus for a fixed sequence of tiebreaking rules (e.g., the same adversarially-chosen tiebreak direction that is applied to determine  $v$  is also applied to determine  $v'$ ), it follows that the primal iterates of running (OFP) on  $A$  will be identical to those of running (OFP) on  $(A + c\mathbf{1})$  (and note the same argument holds for any FTRL algorithm or variant, including standard Fictitious Play and Alternating Fictitious Play).

Now suppose  $\det A \neq 0$ . Let  $\tilde{A}$  be the matrix

$$\tilde{A} = A + \left( \frac{\det A}{a + b - (c + d)} \right) \cdot \mathbf{1}.$$

By straightforward calculations, it follows that  $\det \tilde{A} = 0$ . Moreover, by (17),  $\tilde{A}$  has the same unique interior Nash equilibrium as  $A$ , and by the arguments above, the iterates of running (OFP) on  $\tilde{A}$  are equivalent to those on  $A$ . Thus without loss of generality, we assume  $\det A = 0$ .

We now establish that we can assume  $a > \max\{0, b, c\}$  without loss of generality. First, we show  $a \neq 0$  holds: by the assumption that  $\det A = ad - bc = 0$ , if  $a = 0$ , then  $bc = 0$ . However, by (17) and the assumption that  $(x_1^*, x_2^*)$  is interior, we must have  $a - c \neq 0 \implies c \neq 0$ , which implies  $b = 0$ . This violates the constraint from (17) that  $a - b = b \neq 0$ , and thus without loss of generality,  $a \neq 0$ . To show without loss of generality that also  $a > 0$ , observe that the bilinear objective of the zero-sum game is given by

$$\max_{x_1 \in \Delta_2} \min_{x_2 \in \Delta_2} \langle x_1, Ax_2 \rangle = \max_{x_1 \in \Delta_2} \min_{x_2 \in \Delta_2} -\langle x_1, -Ax_2 \rangle = - \max_{x_2 \in \Delta_2} \min_{x_1 \in \Delta_2} \langle x_2, -A^\top x_1 \rangle.$$

Thus, by switching the maximization or minimization role between the players (via scaling the matrix by -1), we may assume that  $a > 0$ . Finally, to show  $a > \max\{b, c\}$  holds without loss of generality, observe from (17) that if  $a + d - (b + c) > 0$ , then the interior Nash condition in (17) implies  $a > c$  and  $a > b$ . If instead  $a + d - (b + c) < 0$ , then  $0 < a < \min\{b, c\}$ , and we can then rewrite the bilinear objective of the zero-sum game using a new payoff matrix with relabeled strategies (i.e., permuting the columns of  $A$ ), as

$$\max_{x_1 \in \Delta_2} \min_{x_2 \in \Delta_2} \langle x_1, Ax_2 \rangle = \max_{x_1 \in \Delta_2} \min_{x_2 \in \Delta_2} \langle x_1, A'x_2 \rangle \quad \text{where } A' = \begin{pmatrix} b & a \\ d & c \end{pmatrix}. \quad (20)$$

Under  $A'$ , we have  $b + c - (a + d) > 0$ , which from (17) and the reasoning above implies  $b > \max\{a, d\} > 0$ . As a consequence, by possibly permuting the columns of  $A$  and relabeling the strategies of Player 1, we can assume in either case that  $a > \max\{b, c\}$ . Together, we conclude that the assumption  $a > \max\{0, b, c\}$  holds without loss of generality.

Similarly, it follows that we may also assume  $d > \max\{0, b, c\}$  without loss of generality. Specifically, using the relabeling argument above, we may assume  $a + d - (b + c) > 0$ . Then under the unique interior Nash and  $\det A = 0$  assumptions, it follows from (17) (using similar arguments as for  $a \neq 0$ ) that  $d \neq 0$  and  $d > \max\{b, c\}$ . Moreover, as  $a > 0$ , if also  $d < 0$ , then this implies  $c, b < 0$ , meaning  $\det A = ab - cd < 0$ , contradicting the assumption that  $\det A = 0$ . Thus also  $d > 0$ , and we conclude that the assumption  $d > \max\{0, b, c\}$  holds without loss of generality.  $\square$

## B.2 Proof of Proposition 4.2

We restate the proposition here for convenience:

**Proposition 4.2.** *Let  $A$  satisfy Assumption 1, and let  $\{y_1^t\}$  and  $\{y_2^t\}$  be the dual payoff vectors of (OFP). Then for every  $t \geq 1$ , it holds that  $y_{12}^t = -\rho_1 \cdot y_{11}^t$  and  $y_{22}^t = -\rho_2 \cdot y_{21}^t$ , where  $\rho_1 := (d - c)/(a - b) > 0$  and  $\rho_2 := (d - b)/(a - c) > 0$ .*

*Proof.* For player 1, let  $v_1 = (d - c, a - b)$ . Then observe that

$$A^\top v_1 = \begin{pmatrix} a & c \\ b & d \end{pmatrix} \begin{pmatrix} d - c \\ a - b \end{pmatrix} = \begin{pmatrix} ad - ac + ac - bc \\ bd - bc + ad - bd \end{pmatrix} = \begin{pmatrix} 0 \\ 0 \end{pmatrix},$$

where the final equality follows from the assumption that  $\det A = ab - cd = 0$ . Then for any  $x \in \Delta_2$ , we have

$$0 = \langle x, A^\top v_1 \rangle = \langle v_1, Ax \rangle.$$

613 As  $y_1^t = \sum_{k=1}^{t-1} Ax_2^k$ , this implies

$$\langle v_1, y_1^t \rangle = \sum_{k=1}^{t-1} \langle v_1, Ax_2^k \rangle = 0.$$

614 Thus for all  $t$ , we have  $\langle v_1, y_1^t \rangle = (d-c) \cdot y_{11}^t + (a-b) \cdot y_{12}^t = 0$ . Rearranging, and recalling that  
 615  $\rho_1 := (d-c)/(a-b) > 0$  (where the inequality follows by Assumption 1), we find  $y_{12}^t = -\rho_1 \cdot y_{11}^t$ .

616 For the second player, let  $v_2 = (d-b, a-c)$ . Using a similar argument and calculation, we have  
 617  $Av_2 = 0 \in \mathbb{R}^2$  and thus

$$\langle v_2, y_2^t \rangle = \sum_{k=1}^{t-1} \langle v_2, -A^\top x_1^k \rangle = \sum_{k=1}^{t-1} \langle x_1^k, -Av_2 \rangle = 0.$$

618 For all  $t$ , it then follows that  $\langle v_2, y_2^t \rangle = (d-b) \cdot y_{21}^t + (a-c) \cdot y_{22}^t = 0$ , meaning  $y_{22}^t = -\rho_2 \cdot y_{21}^t$ .  $\square$

## 619 C Proofs for Optimistic Fictitious Play Regret Upper Bound

620 In this section, we develop the omitted proofs from Section 4 that are needed to establish the main  
 621 technical result of Theorem 3.5 (showing Optimistic FP has bounded energy in  $2 \times 2$  games).

### 622 C.1 Properties of the Energy Threshold $B$

623 In this section, we prove several properties related to the threshold  $B$  that is used in the proof of  
 624 Theorem 3.5: Recall that  $B$  is defined as follows:

625 **Definition 4.7.** Fix  $A$  satisfying Assumption 1, and recall  $a_{\max} = \|A\|_\infty$ . Then define  $B > 0$  by

$$B = \min \{b \in \mathbb{R}_+ : \text{for all } z \in \mathbb{R}^2, \|z\|_1 \leq 6a_{\max} \implies \psi(z) \leq b\}.$$

626 First, we prove the following upper bound on the magnitude of  $B$  with respect to the constants  
 627  $a_{\max}$ ,  $\rho_1$ , and  $\rho_2$ :

628 **Proposition 4.8.** Let  $B$  be the constant from Definition 4.7. Then  $B \leq 6a_{\max}(1 + \rho_1 + \rho_2)$ .

629 *Proof.* By definition of  $B$ , the level set  $\mathcal{L} = \{z \in \mathbb{R}^2 : \psi(z) = B\}$  must intersect the boundary of  
 630 the ball  $\mathcal{B} = \{z \in \mathbb{R}^2 : \|z\|_1 \leq B\}$  on at least one of the boundaries  $P_{i \sim (i+1)}$  in the set  $\tilde{\mathcal{P}}$  from  
 631 Definition 4.3. Let  $\mathcal{I} = \tilde{\mathcal{P}} \cap \mathcal{B} \cap \mathcal{L}$  be the intersection of these three sets. Using the definition of  $\psi$   
 632 from (10) it follows that for  $z \in \mathcal{I}$

$$B = \psi(z) = \begin{cases} \rho_1 \cdot |z_1| = \rho_1 \cdot 6a_{\max} & \text{if } z \in P_{1 \sim 2} \\ |z_2| = 6a_{\max} & \text{if } z \in P_{2 \sim 3} \\ |z_1| = 6a_{\max} & \text{if } z \in P_{3 \sim 4} \\ \rho_2 \cdot |z_2| = \rho_2 \cdot 6a_{\max} & \text{if } z \in P_{4 \sim 1} \end{cases},$$

633 where in each case the equality comes from the fact that if  $z \in \mathcal{I}$  then  $\|z\|_1 = 6a_{\max}$ . It follows that

$$B \leq 6a_{\max} \cdot \max\{1, \rho_1, \rho_2\} \leq 6a_{\max}(1 + \rho_1 + \rho_2),$$

634 where the final inequality comes from the fact that  $\rho_1, \rho_2 > 0$ .  $\square$

635 Next, we establish the following invariant:

636 **Proposition C.1.** Let  $B$  be the constant from Definition 4.3. Suppose  $\psi(z) > B$  and suppose  
 637  $z \in \hat{P}_i \cup P_{(i-1) \sim i}$  for some  $i \in [4]$ . Assume either  $\tilde{z} = z + S_j$  or  $\tilde{z} = z + S_j + S_k$  for  $j, k \in [4]$  and  
 638  $S$  as in (OPF Dual). Then

$$\tilde{z} \notin \hat{P}_{i+2} \cup P_{(i+1) \sim (i+2)}. \quad (21)$$

639 *Proof.* We prove the claim for the case that  $\tilde{z} = z + S_j + S_k$ , which by the same argument implies  
 640 the result when  $\tilde{z} = z + S_j$ . Without loss of generality, assume  $i = 1$ . Under the assumptions of  
 641 the proposition, we will show that if  $z \in \hat{P}_1 \cup P_{4 \sim 1}$ , then  $\tilde{z} \notin \hat{P}_3 \cup P_{2 \sim 3}$ . For this, observe first by  
 642 definition of  $B$  that if  $\psi(z) > B$  then  $\|z\|_1 > 6a_{\max}$ . By definition of the sets  $\hat{P}_1$  and  $\hat{P}_3 \cup P_{2 \sim 3}$ ,  
 643 this implies that

$$\min_{z' \in \hat{P}_3 \cup P_{2 \sim 3}} \|z - z'\|_2 \geq \|z\|_2 \geq \frac{1}{\sqrt{2}} \|z\|_1 > \frac{6a_{\max}}{\sqrt{2}} \geq 4a_{\max}. \quad (22)$$

644 On the other hand, by construction of  $\tilde{z}$ , and using the fact that  $\|S\|_2 \leq 2a_{\max}$ , we have

$$\|z - \tilde{z}\|_2 \leq \|S_j\|_2 + \|S_k\|_2 \leq 2(2a_{\max}) = 4a_{\max}. \quad (23)$$

645 Then combining expressions (22) and (23), we find

$$\|z - \tilde{z}\|_2 < \min_{z' \in \hat{P}_3 \cup P_{2 \sim 3}} \|z - z'\|_2,$$

646 and thus  $\tilde{z} \notin \hat{P}_3 \cup P_{2 \sim 3}$ . □

## 647 C.2 Energy Upper Bound: Proof of Lemma 4.9

648 This section gives the proof of Lemma 4.9, which derives an upper bound on the energy  $\psi(z^{t+1})$   
 649 when  $\psi(z^t) \leq B$ . Restated here:

650 **Lemma 4.9.** *Suppose  $\psi(z^t) \leq B$ , and let  $B' = 8a_{\max}(1 + \rho_1 + \rho_2)^2$ . Then  $\psi(z^{t+1}) \leq B'$*

651 *Proof.* Using the definition of  $\psi$  from (10), observe that

$$\psi(z^{t+1}) \leq \max \{ \max(\rho_1, \rho_2) \cdot \|z^{t+1}\|_1, \|z^{t+1}\|_1 \} \leq (1 + \rho_1 + \rho_2) \cdot \|z^{t+1}\|_1. \quad (24)$$

652 Now recall by definition of the constant  $B$  that  $\psi(z^t) \leq B \implies \|z^t\|_1 \leq B$ . Then as  $\|z^{t+1}\|_1 =$   
 653  $\|z^t + S_j\|_1$  for some  $j \in [4]$ , we have that

$$\begin{aligned} \|z^{t+1}\|_1 &\leq \|z^t\|_1 + 2a_{\max} \leq B + 2a_{\max} \\ &\leq 6a_{\max}(1 + \rho_1 + \rho_2) + 2a_{\max} \\ &\leq 8a_{\max}(1 + \rho_1 + \rho_2). \end{aligned} \quad (25)$$

654 Here, the penultimate inequality follows from the upper bound on  $B$  from Proposition 4.8, and the  
 655 final inequality follows from the positivity of  $\rho_1, \rho_2$ .

656 Combining expressions (24) and (25), we conclude that

$$\psi(z^{t+1}) \leq 8a_{\max}(1 + \rho_1 + \rho_2)^2. \quad \square$$

## 657 C.3 Cycling Invariants and Non-Increasing Energy Growth: Proof of Lemma 4.10

658 In this section, we develop the proof of Lemma 4.10, restated here:

659 **Lemma 4.10.** *Suppose  $\psi(z^t) > B$  and  $z^t \in \hat{P}_i$  for  $i \in [4]$ . Then the following hold:*

- 660 (1) *Either (i)  $\tilde{z}^{t+1}, z^{t+1} \in \hat{P}_i$  or (ii)  $\tilde{z}^{t+1}, z^{t+1} \in P_{i+1}$*   
 661 (2)  $\Delta\psi(z^t) = \psi(z^{t+1}) - \psi(z^t) \leq 0$ .

662 We give the proof of Lemma 4.10 in two parts: first in Lemma C.2 (Section C.3.1), we prove the  
 663 invariants from Part (1). Then, in Lemma C.6 (Section C.3.2), we prove the non-positive energy  
 664 growth bounds from Part (2).

665 In Figure 3, we also give visual intuition for the two claims of Lemma 4.10. In the figure, each  
 666 subfigure shows the dual space  $\mathbb{R}^2$ , and the green region denotes the sublevel set  $\psi(z) \leq B$ . The left  
 667 subfigure illustrates that for  $\psi(z^t) > B$ , the vectors  $z^{t+1}$  and  $\tilde{z}^{t+1}$  will lie in the same region of  $\mathcal{P}$ ,  
 668 and thus  $\Delta\psi(z^t) \leq 0$  (the latter point is captured by the fact that  $z^{t+1}$  lies within the sublevel set  
 669  $\psi(z) \leq B$ ). In contrast, as illustrated in the right subfigure, when  $\psi(z^t) \leq B$ , then in general the  
 670 invariants of Part (1) of the lemma may not hold, and  $\Delta\psi(z^t)$  can be strictly positive.



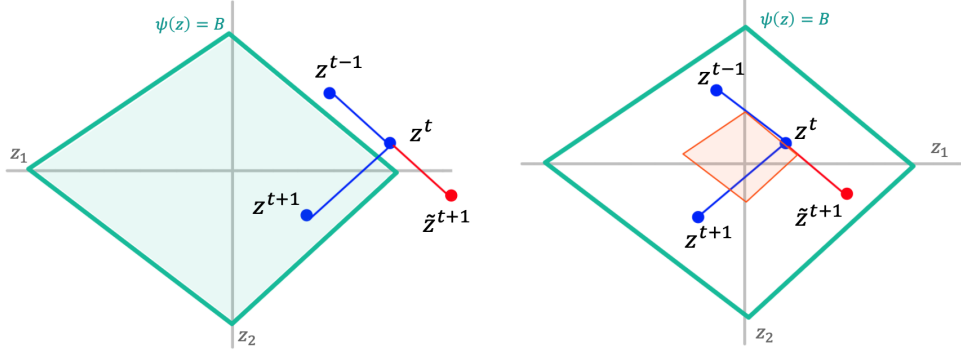

Figure 3: Visual intuition for the claims and proof of Lemma 4.10.

### 671 C.3.1 Cycling Invariants: Part 1 of Lemma 4.10

672 In this section, we state and prove the following lemma, which establishes certain “cycling invariants”  
 673 on the relationship between the predicted cost vector  $\tilde{z}^{t+1}$  and true cost vector  $z^{t+1}$  that hold when  
 674 the energy  $\psi(z^t)$  is sufficiently large.

675 **Lemma C.2.** Suppose  $\psi(z^t) > B$  and  $z^t \in \hat{P}_i$  for  $i \in [4]$ . Then either

676 (i)  $\tilde{z}^{t+1} \in \hat{P}_i$  and  $z^{t+1} \in \hat{P}_i$ , or

677 (ii)  $\tilde{z}^{t+1} \in P_{i+1}$  and  $z^{t+1} \in P_{i+1}$ .

678 **Proof of Lemma C.2.** The proof of lemma C.2 proceeds using three separate propositions, which  
 679 we state and prove as follows:

680 First, we establish regions in which  $\tilde{z}^{t+1}$  and  $z^{t+1}$  cannot lie when the energy  $\psi$  is sufficiently large.

681 **Proposition C.3.** Suppose  $\psi(z^t) > B$  and  $z^t \in \hat{P}_i$  for some  $i \in [4]$ . Then

$$\tilde{z}^{t+1}, z^{t+1} \notin \hat{P}_{i+2} \cup P_{(i+1) \sim (i+2)} \cup \hat{P}_{i-1}.$$

682 *Proof.* We first show that  $\tilde{z}^{t+1}, z^{t+1} \notin \hat{P}_{i+2} \cup P_{(i+1) \sim (i+2)}$ . For this, recall that both  $z^{t+1} = z^t + S_j$   
 683 and  $\tilde{z}^{t+1} = z^t + S_k$  for some  $j, k \in [4]$ . As  $\psi(z^t) > B$ , then applying Proposition C.1 implies that  
 684 both  $z^{t+1}, \tilde{z}^{t+1} \notin \hat{P}_{i+2} \cup P_{(i+1) \sim (i+2)}$ .

685 Next, we establish that  $z^{t+1} \notin \hat{P}_{i-1}$ . For this, as  $z^t \in \hat{P}_i$ , then either (a)  $\tilde{z}^{t+1} \in \hat{P}_{i-1}$  or (b)  
 686  $\tilde{z}^{t+1} \in \hat{P}_{i+2} \cup P_{(i+1) \sim (i+2)}$ . We have already established case (b) cannot hold. Similarly, as  
 687  $\psi(z^t) > B$  implies  $\|z^t\|_1 > 3a_{\max}$ , then case (a) implies that either  $\psi(z^t) \leq B$  or  $z^{t+1} \notin \hat{P}_{i-1}$ ,  
 688 which is a contradiction. So  $z^{t+1} \notin \hat{P}_{i-1}$ .

689 Similarly, to have  $\tilde{z}^{t+1} \in \hat{P}_{i-1}$ , then by definition of  $S$  we must have either (a)  $z^t - z^{t-1} = S_{i+2}$   
 690 or (b)  $z^t - z^{t-1} = S_{i+1}$ . Case (a) implies  $\tilde{z}^t \in \hat{P}_{i+2} \cup P_{(i+1) \sim (i+2)}$ , which cannot hold due to  
 691 Proposition C.1. Case (b) implies  $\tilde{z}^t \in \hat{P}_{i+1} \cup P_{i \sim (i+1)}$ , which again due to the definition of  $B$   
 692 contradicts that either  $\psi(z^t) > B$  or that  $\tilde{z}^{t+1} \in \hat{P}_{i-1}$ . Thus we conclude  $\tilde{z}^{t+1} \notin \hat{P}_{i-1}$ .  $\square$

693 Proposition C.3 establishes that if  $\psi(z^t) > B$ , then we must have  $\tilde{z}^{t+1}, z^{t+1} \in \hat{P}_i \cup P_{i+1}$ . Thus to  
 694 conclude the proof of Lemma C.2, it suffices to establish that  $\tilde{z}^{t+1} \in \hat{P}_i \implies z^{t+1} \in \hat{P}_i$  and that  
 695  $\tilde{z}^{t+1} \in P_{i+1} \implies z^{t+1} \in P_{i+1}$ . We prove these claims in the following two propositions:

696 **Proposition C.4.** Suppose  $\psi(z^t) > B$  and  $z^t \in \hat{P}_i$  for some  $i \in [4]$ . Then:

$$\tilde{z}^{t+1} \in \hat{P}_i \implies z^{t+1} \in \hat{P}_i.$$

697 *Proof.* We distinguish the cases when  $\tilde{z}^{t+1} \in P_i$  and  $\tilde{z}^{t+1} \in P_{i \sim (i+1)}$ . In the first case, if  $\tilde{z}^{t+1} \in P_i$ ,  
698 then by definition  $z^{t+1} = z^t + S_i$ . If  $\psi(z^{t+1}) = \psi(z^t)$ , then  $z^{t+1} = \tilde{z}^{t+1} \in P_i$ . If instead  
699  $\psi(z^{t+1}) \neq \psi(z^t)$ , then  $\tilde{z}^{t+1} = z^t - z^{t-1} = S_j$  for some  $j \neq i \in [4]$ . However, by definition of the  
700 constant  $B$ , we must have  $z^{t+1} \notin P_{i+1}$ , as otherwise the assumption  $\psi(z^t) > B$  would be violated.  
701 Then Proposition C.3 implies  $z^{t+1} \in \hat{P}_i$ . Thus if  $\tilde{z}^{t+1} \in P_i$ , then  $z^{t+1} \in \hat{P}_i$ .

702 For the second case, suppose  $\tilde{z}^{t+1} \in P_{i \sim (i+1)}$ . Then we must have  $\tilde{z}^{t+1} - z^t \in \{S_i, S_{i+1}\}$ .  
703 Moreover, recall that  $Q(\tilde{z}^{t+1}) \in \{e_i, e_{i+1}\}$ . In either case, using the structure of adjacent columns  $i$   
704 and  $i+1$  of  $S$ , it follows that  $z^{t+1} \in P_{i \sim (i+1)} \subset \hat{P}_i$ . Thus if  $\tilde{z}^{t+1} \in P_{i \sim (i+1)}$ , then also  $z^{t+1} \in \hat{P}_i$ ,  
705 which concludes the proof.  $\square$

706 **Proposition C.5.** Suppose  $\psi(z^t) > B$  and  $z^t \in \hat{P}_i$  for some  $i \in [4]$ . Then:

$$\tilde{z}^{t+1} \in P_{i+1} \implies z^{t+1} \in P_{i+1}.$$

707 *Proof.* Suppose  $z^t \in P_i$ . If  $\tilde{z}^{t+1} \in P_{i+1}$ , then  $Q(z^{t+1}) = e_{i+1}$ , and also  $\tilde{z}^{t+1} - z^t \in \{S_i, S_{i+1}\}$ .  
708 Using the structure of adjacent columns  $i$  and  $i+1$  of  $S$ , it then follows that  $z^{t+1} = z^t + S_{i+1} \in P_{i+1}$ .

709 Similarly, if instead  $z^t \in P_{i \sim (i+1)}$ , then  $z^{t+1} = z^t + S_{i+1} \in P_{i+1}$  by definition of  $S$ . Thus in either  
710 case, if  $\tilde{z}^{t+1} \in P_{i+1}$ , then also  $z^{t+1} \in P_{i+1}$ .  $\square$

### 711 C.3.2 Non-Increasing Energy Growth: Part (2) of Lemma 4.10

712 In this section we state and prove the following lemma, which gives non-positive bounds on the  
713 energy growth under the two cases in Part (1) of Lemma 4.10:

714 **Lemma C.6.** Fix  $i \in [4]$ , and suppose  $z^t \in \hat{P}_i$ . Suppose that either (i)  $\tilde{z}^{t+1} \in \hat{P}_i$  and  $z^{t+1} \in \hat{P}_i$  or  
715 (ii)  $\tilde{z}^{t+1} \in P_{i+1}$  and  $z^{t+1} \in P_{i+1}$ . Then  $\Delta\psi(z^t) \leq 0$ .

716 *Proof.* To start, we rederive the one-step change in energy growth under (OFP Dual).

717 **One-step change in energy:** Using (OFP Dual) and Definition 4.5, we have for any  $t \geq 1$ :

$$\Delta\psi(z^t) = \psi(z^{t+1}) - \psi(z^t) \tag{26}$$

$$= \langle z^{t+1}, MQ(z^{t+1}) \rangle - \langle z^t, MQ(z^t) \rangle \tag{27}$$

$$= \langle z^t + SQ(\tilde{z}^{t+1}), MQ(z^{t+1}) \rangle - \langle z^t, MQ(z^t) \rangle \tag{28}$$

$$= \underbrace{\langle z^t, M(Q(z^{t+1}) - Q(z^t)) \rangle}_{(a)} + \underbrace{\langle Q(\tilde{z}^{t+1}), S^\top MQ(z^{t+1}) \rangle}_{(b)}. \tag{29}$$

718 By the definitions of  $S$  and  $M$  from expressions (OFP Dual) and (11), respectively, recalling that  
719  $\rho_1 = (d - c)/(a - b)$  and  $\rho_2 = (d - b)/(a - c)$ , and using the fact from Assumption 1 that  
720  $\det A = ab - cd = 0$ , we can compute

$$S^\top M = \begin{pmatrix} b & -c \\ a & -c \\ a & -a \\ b & -a \end{pmatrix} \begin{pmatrix} -\rho_1 & -\rho_1 & 1 & 1 \\ -\rho_2 & 1 & 1 & -\rho_2 \end{pmatrix} = \begin{pmatrix} 0 & d-c & b-c & b-d \\ c-d & 0 & a-c & a-d \\ b-c & c-a & 0 & a-b \\ d-b & d-a & b-a & 0 \end{pmatrix}. \tag{30}$$

721 Thus, expression (30) shows  $S^\top M$  is skew-symmetric.

722 **Proof for Case (i):** To prove the claim for case (i) of the lemma, we start with the case that  $z^t \in P_i$   
723 and also  $\tilde{z}^{t+1}, z^{t+1} \in P_i$ . Then by definition of  $Q$ , we have  $Q(z^t) = Q(\tilde{z}^{t+1}) = Q(z^{t+1}) = e_i$ . By  
724 skew-symmetry of  $S^\top M$ , observe in part (b) of expression (29) that

$$\langle Q(\tilde{z}^{t+1}), S^\top MQ(z^{t+1}) \rangle = \langle Q(z^{t+1}), S^\top MQ(z^{t+1}) \rangle = 0.$$

725 Moreover, in part (a) of expression (29), we also have

$$\langle z^t, M(Q(z^{t+1}) - Q(z^t)) \rangle = \langle z^t, M(Q(z^t) - Q(z^t)) \rangle = 0,$$

726 and thus  $\Delta\psi(z^t) = 0$ . In the case that  $z^t \in P_i$  and  $\tilde{z}^{t+1} \in P_{i \sim (i+1)}$ , then observe from the structure  
 727 of  $S$  that we must also have  $z^{t+1} \in P_{i \sim (i+1)}$ . Then by definition of  $\psi$ , for any  $z \in P_{i \sim (i+1)}$ , we  
 728 have  $\psi(z) = \langle z, Me_i \rangle$ . Thus we can rewrite expression (26) as

$$\Delta\psi(z^t) = \langle z^t + SQ(\tilde{z}^{t+1}), Me_i \rangle - \langle z^t, MQ(z^t) \rangle \quad (31)$$

$$= \langle z^t, M(e_i - Q(z^t)) \rangle + \langle Q(\tilde{z}^{t+1}), S^\top Me_i \rangle. \quad (32)$$

729 As  $z^t \in P_i \implies Q(z^t) = e_i$ , the first term above vanishes. Moreover, as  $\tilde{z}^{t+1} \in P_{i \sim (i+1)}$ , we  
 730 have  $Q(\tilde{z}^{t+1}) \in \{e_i, e_{i+1}\}$ . By skew-symmetry of  $S^\top M$ , if  $Q(\tilde{z}^{t+1}) = e_i$ , then the second term of  
 731 (32) also vanishes. On the other hand, if  $Q(\tilde{z}^{t+1}) = e_{i+1}$ , then the second term is negative, which  
 732 follows from the fact that, under Assumption 1, each entry  $(S^\top M)_{i+1,i} < 0$ . In either case, we find  
 733  $\Delta\psi(z^t) \leq 0$ .

734 Finally, observe that if  $z^t \in P_{i \sim (i+1)}$ , then by definition of (OFP Dual), we cannot have both  
 735  $\tilde{z}^{t+1}, z^{t+1} \in \hat{P}_i$ . Thus the conditions of case (i) do not apply, which concludes the proof of the  
 736 lemma under case (i).

737 **Proof for Case (ii):** To prove the claim for case (ii), suppose first that  $z^t \in P_i$  and thus  $Q(z^t) = e_i$ .  
 738 By the assumptions of claim (ii), we also have  $Q(\tilde{z}^{t+1}) = Q(z^{t+1}) = e_{i+1}$ . Thus it again follows by  
 739 skew-symmetry of  $S^\top M$  that for part (b) of expression (29)

$$\langle Q(\tilde{z}^{t+1}), S^\top MQ(z^{t+1}) \rangle = 0. \quad (33)$$

740 For part (a) of (29), by case analysis on the columns of  $M$ , it follows that when  $Q(z^t) = e_i$  and  
 741  $Q(z^{t+1}) = e_{i+1}$ , then

$$\langle z^t, M(Q(z^{t+1}) - Q(z^t)) \rangle = \begin{cases} (1 + \rho_2) \cdot z_2^t & \text{if } Q(z^t) = e_1 \\ (1 + \rho_1) \cdot z_1^t & \text{if } Q(z^t) = e_2 \\ -(1 + \rho_2) \cdot z_2^t & \text{if } Q(z^t) = e_3 \\ -(1 + \rho_1) \cdot z_1^t & \text{if } Q(z^t) = e_4 \end{cases}. \quad (34)$$

742 Given the definition of  $Q$ , it follows that  $Q(z^t) = e_1 \implies z_2^t \leq 0$ , that  $Q(z^t) = e_2 \implies z_1^t \leq 0$ ,  
 743 that  $Q(z^t) = e_3 \implies z_2^t \geq 0$ , and that  $Q(z^t) = e_4 \implies z_1^t \geq 0$ . Together with the fact that  
 744  $\rho_1, \rho_2 > 0$  by definition, in each case of expression (34), we find  $\langle z^t, M(Q(z^{t+1}) - Q(z^t)) \rangle \leq 0$ .  
 745 Together with (33), this means  $\Delta\psi(z^t) \leq 0$ .

746 In the case that  $z^t \in P_{i \sim (i+1)}$ , then either  $Q(z^t) = e_i$  or  $Q(z^t) = e_{i+1}$ . If the latter holds, given  
 747 that also  $Q(z^{t+1}) = e_{i+1}$  by assumption, then part (a) of (29) is trivially 0. If the former holds, we  
 748 recover the cases of expression (34), and thus part (a) of (29) is non-positive. In either case, part  
 749 (b) of (29) remains 0 as in expression (33), and thus we conclude that  $\Delta\psi(z^t) \leq 0$ . This proves the  
 750 lemma under case (ii).  $\square$

## 751 D Proofs for Alternating Fictitious Play Regret Lower Bound

752 In this section, we develop the proof of Theorem 3.2, which gives a *lower bound* of  $\Omega(\sqrt{T})$  on the  
 753 regret of Alternating Fictitious Play. Restated here:

754 **Theorem 3.2.** Suppose  $x_1^1 = (p, 1 - p) \in \Delta_2$  for irrational  $p \in (3/4, 1)$ , and let  $\{x^t\}$  be the iterates  
 755 of Alternating FP on (Matching Pennies) using any tiebreaking rule. Then  $\text{Reg}^{\text{alt}}(T) \geq \Omega(\sqrt{T})$ .

756 The organization of this section is as follows: in Section D.1 we recall the setup of alternating play in  
 757 zero-sum games, as well as on the notion of alternating regret. In Section D.2, we formally define the  
 758 Alternating Fictitious Play algorithm. Finally, in Section D.3, we give the proof of Theorem 3.2.

### 759 D.1 Details on Alternating Play and Alternating Regret

760 **Alternating play.** We consider the model of alternating online learning in two-player zero-sum  
 761 games as in Bailey et al. (2020); Wibisono et al. (2022); Katona et al. (2024). Defined formally:

762 **Definition D.1** (Alternating Play). Fix a payoff matrix  $A \in \mathbb{R}^{m \times n}$ . Over  $T$  rounds, Players 1 and 2  
 763 alternate updating their strategies  $x_1^t \in \Delta_m$  and  $x_2^t \in \Delta_n$  as follows:

764 • **(Initialization)** Assume without loss of generality  $T$  is even. At time  $t = 1$ , Player 1 chooses  
 765 an initial  $x_1^1 \in \Delta_m$ , and Player 2 observes  $-A^\top x_1^1$ .

766 • **(Even rounds – Player 2 updates)** When  $t = 2k$  (for  $k \geq 1$ ):

Player 1 sets  $x_1^t = x_1^{t-1} \in \Delta_m$       Player 2 updates  $x_2^t \in \Delta_n$ .  
 Player 1 observes  $Ax_2^t$       Player 2 observes  $-A^\top x_1^{t-1}$ .

767 • **(Odd rounds – Player 1 updates)** When  $t = 2k + 1$  (for  $k \geq 1$ ):

Player 1 updates  $x_1^t \in \Delta_m$       Player 2 sets  $x_2^t = x_2^{t-1} \in \Delta_n$ .  
 Player 1 observes  $Ax_2^{t-1}$       Player 2 observes  $-A^\top x_1^t$ .

768 **Alternating regret.** Under alternating play, we now measure the performance of each player by its  
 769 *alternating regret* (Wibisono et al., 2022; Cevher et al., 2023; Hait et al., 2025). For this, first observe  
 770 under alternating play that each player’s *cumulative payoff* can be written as:

$$\begin{aligned} \text{Player 1 cumulative payoff: } & \sum_{k=1}^{T/2} \langle x_1^{2k-1}, A(x_2^{2k} + x_2^{2k-2}) \rangle . \\ \text{Player 2 cumulative payoff: } & \sum_{k=1}^{T/2} \langle x_2^{2k}, -A^\top (x_1^{2k+1} + x_1^{2k-1}) \rangle . \end{aligned} \quad (35)$$

771 Here and throughout, we assume for notational convenience that  $x_2^0 = 0 \in \mathbb{R}^n$  and  $x_1^{T+1} = 0 \in \mathbb{R}^m$ .  
 772 Then alternating regret is defined as follows:

773 **Definition D.2** (Alternating Regret). Let  $T$  be even. Define  $\text{Reg}_1^{\text{alt}}(T)$  and  $\text{Reg}_2^{\text{alt}}(T)$  as

$$\begin{aligned} \text{Reg}_1^{\text{alt}}(T) &= \max_{x \in \Delta_m} \sum_{k=1}^{T/2} \langle x - x_1^{2k-1}, A(x_2^{2k} + x_2^{2k-2}) \rangle \\ \text{Reg}_2^{\text{alt}}(T) &= \min_{x \in \Delta_n} \sum_{k=1}^{T/2} \langle x_2^{2k} - x, A^\top (x_1^{2k+1} + x_1^{2k-1}) \rangle . \end{aligned}$$

774 Then define  $\text{Reg}^{\text{alt}}(T) = \text{Reg}_1^{\text{alt}}(T) + \text{Reg}_2^{\text{alt}}(T)$ .

775 Similar to standard (simultaneous) play, sublinear regret bounds for  $\text{Reg}^{\text{alt}}(T)$  correspond to conver-  
 776 gence of the time-average iterates under alternating play to a Nash equilibrium of  $A$ . For this, define  
 777 the time-average iterates  $\tilde{x}_1^T \in \Delta_m$  and  $\tilde{x}_2^T \in \Delta_n$  by

$$\tilde{x}_1^T = \frac{1}{T} \left( \sum_{k=1}^{T/2} x_1^{2k-1} + x_1^{2k+1} \right) \quad \text{and} \quad \tilde{x}_2^T = \frac{1}{T} \left( \sum_{k=1}^{T/2} x_2^{2k-2} + x_2^{2k+2} \right) . \quad (36)$$

778 Then we have the following proposition (analogous to Proposition 2.1 for simultaneous play):

779 **Proposition D.3.** Fix  $A \in \mathbb{R}^{m \times n}$ . Let  $\tilde{x}_1^T \in \Delta_m$  and  $\tilde{x}_2^T \in \Delta_n$  denote the time-average iterates  
 780 under the alternating play of Definition D.2, as in expression (36). Suppose  $\text{Reg}^{\text{alt}}(T) \leq \alpha = o(T)$ .  
 781 Then  $(\tilde{x}_1^T, \tilde{x}_2^T)$  converges in duality gap to an NE of  $A$  at a rate of  $\alpha/T = o(1)$ .

782 *Proof.* By definition of the player-wise cumulative costs from (35) (and recalling that we set  $x_2^0 =$   
 783  $0 \in \mathbb{R}^n$  and  $x_1^{T+1} = 0 \in \mathbb{R}^m$  for notational convenience), observe that

$$\sum_{k=1}^{T/2} \langle x_1^{2k-1}, A(x_2^{2k} + x_2^{2k-2}) \rangle + \sum_{k=1}^{T/2} \langle x_2^{2k}, -A^\top (x_1^{2k+1} + x_1^{2k-1}) \rangle = 0 .$$

784 It follows from the Definition D.2 that

$$\begin{aligned} \text{Reg}^{\text{alt}}(T) &= \text{Reg}_1^{\text{alt}}(T) + \text{Reg}_2^{\text{alt}}(T) \\ &= \max_{x \in \Delta_m} \sum_{k=1}^{T/2} \langle x, A(x_2^{2k} + x_2^{2k-2}) \rangle - \min_{x \in \Delta_n} \sum_{k=1}^{T/2} \langle x, A^\top (x_1^{2k+1} + x_1^{2k-1}) \rangle \\ &= \max_{x \in \Delta_m} \langle x, A(T \cdot \tilde{x}_2^T) \rangle - \min_{x \in \Delta_n} \langle x, A^\top (T \cdot \tilde{x}_1^T) \rangle \leq \alpha , \end{aligned}$$

where in the final line we use the definition of  $\tilde{x}_1^T$  and  $\tilde{x}_2^T$  from (36) and the assumption that  $\text{Reg}(T) \leq \alpha$ . Then dividing by  $T$  gives

$$\text{DG}(\tilde{x}_1^T, \tilde{x}_2^T) = \max_{x \in \Delta_m} \langle x, A\tilde{x}_2^T \rangle - \min_{x \in \Delta_n} \langle x, A^\top \tilde{x}_1^T \rangle \leq \frac{\alpha}{T},$$

which yields the statement of the proposition.  $\square$

## D.2 Details on Alternating Fictitious Play

Under the alternating play setup of Definition D.1, we now specify the Alternating Fictitious Play algorithm. For any even  $t \geq 2$ , the primal iterates of Players 1 and 2 at times  $t+1$  and  $t+2$  update according to

$$\begin{aligned} x_1^{t+1} &:= \operatorname{argmax}_{x \in \{e_i\}_m} \left\langle x, \sum_{k=1}^{t/2} A(x_2^{2k} + x_2^{2k-2}) \right\rangle \quad \text{and} \quad x_2^{t+1} = x_2^t \\ x_2^{t+2} &:= \operatorname{argmax}_{x \in \{e_i\}_n} \left\langle x, \sum_{k=1}^{t/2} -A^\top(x_1^{2k+1} + x_1^{2k-1}) \right\rangle \quad \text{and} \quad x_1^{t+2} = x_1^{t+1}. \end{aligned}$$

In other words, as in standard Fictitious Play (c.f., ( $\alpha$ -**FP**) for  $\alpha = 0$ ), in Alternating Fictitious Play each player (in an alternating fashion), selects the best-response to the cumulative observed payoff vectors over all prior rounds.

**Primal-Dual update for Alternating FP.** Similar to the analysis for Optimistic FP, define the dual payoff vectors  $y_1^t = \sum_{k=1}^{t-1} Ax_2^k \in \mathbb{R}^m$  and  $y_2^t = \sum_{k=1}^{t-1} -A^\top x_1^k \in \mathbb{R}^n$ . Then the iterates of Alternating FP can be equivalently expressed as follows:

**Definition D.4.** Assume the alternating play setting of Definition D.1. Let  $y_1^2 = 0 \in \mathbb{R}^m$ , and let  $y_2^2 = -A^\top x_1^1 \in \mathbb{R}^n$ . Then for  $t \geq 2$ , the dual (i.e.,  $(y_1^t, y_2^t)$ ) and primal (i.e.,  $(x_1^t, x_2^t)$ ) iterates of Alternating FP are given by

$$\begin{aligned} (t \text{ even}) \quad & \begin{cases} x_1^t = x_1^{t-1} \\ x_2^t = \operatorname{argmax}_{x \in \{e_i\}_n} \langle x, y_2^t \rangle \end{cases} \quad \text{and} \quad \begin{cases} y_1^{t+1} = y_1^t + Ax_2^t \\ y_2^{t+1} = y_2^t - A^\top x_1^{t-1} \end{cases} \\ (t \text{ odd}) \quad & \begin{cases} x_1^t = \operatorname{argmax}_{x \in \{e_i\}_m} \langle x, y_1^t \rangle \\ x_2^t = x_2^{t-1} \end{cases} \quad \text{and} \quad \begin{cases} y_1^{t+1} = y_1^t + Ax_2^{t-1} \\ y_2^{t+1} = y_2^t - A^\top x_1^t \end{cases} \end{aligned} \quad (\text{AFP})$$

Moreover, recall the energy function  $\Psi$  from Definition 3.3 and  $\text{Reg}^{\text{alt}}(T)$  from Definition D.2. Then, analogously to Proposition 3.4, following equivalence between energy and alternating regret holds:

**Proposition D.5.** Let  $\{x^t\}$  and  $\{y^t\}$  be iterates of (AFP). Then  $\text{Reg}^{\text{alt}}(T) = \Psi(y^{T+1})$ .

## D.3 Proof of Theorem 3.2: Regret Lower Bound on Matching Pennies

We now prove the lower bound on the regret of (AFP) on Matching Pennies. For this, recall that the Matching Pennies payoff matrix is given by

$$A = \begin{pmatrix} 1 & -1 \\ -1 & 1 \end{pmatrix}. \quad (\text{Matching Pennies})$$

**Subspace Dynamics of AFP for Matching Pennies.** It is straightforward to check that (Matching Pennies) satisfies the conditions of Assumption 1. Moreover, this also implies Proposition 4.2 holds for the dual iterates of (AFP), in particular for  $\rho_1 = \rho_2 = 1$ .

Thus, to prove the theorem, we reuse the components of the *subspace dynamics* introduced in Section 4. Specifically, we reuse the notation of the primal and dual iterates  $\{w^t\}$  and  $\{z^t\}$ , as well as the choice map  $Q$  from Definition 4.4, and the energy  $\psi$  from Definition 4.5.

Under (Matching Pennies), it is then straightforward to check that the matrix  $S$  from (9) and the energy  $\psi$  from Definition 4.5 are given by:

$$S = \begin{pmatrix} -1 & 1 & 1 & -1 \\ 1 & 1 & -1 & -1 \end{pmatrix} \quad \text{and for all } z \in \mathbb{R}^2: \psi(z) = \|z\|_1.$$



815 Similarly to Proposition 4.6, and using the definition of  $\psi$  and the iterates  $\{z^t\}$ , we also have the  
 816 following relationship between  $\Psi$  and  $\psi$ :

817 **Proposition D.6.** *Let  $\{y^t\}$  be the iterates of (AFP) on (Matching Pennies), and let  $\{z^t\}$  be the*  
 818 *corresponding subspace iterates. Then  $\Psi(y^{T+1}) = \psi(z^{T+1})$ .*

819 Moreover, under the primal-dual definition of (9) it follows inductively (and using the definition of  
 820  $\{w^t\}$ ,  $\{z^t\}$ , and  $Q$ ) that for all  $t \geq 3$ :

$$w^t = \begin{cases} Q((z_1^{t-1}, z_2^t)) & \text{for } t \text{ even} \\ Q((z_1^t, z_2^{t-1})) & \text{for } t \text{ odd} \end{cases} . \quad (37)$$

821 Then for  $t \geq 3$  that the dual iterates  $\{z^t\}$  can be further rewritten as

$$z^{t+1} = z^t + SQ(\tilde{z}^{t+1}) \quad \text{where } \tilde{z}^{t+1} = \begin{cases} (z_1^{t-1}, z_2^t) & \text{for } t \text{ even} \\ (z_1^t, z_2^{t-1}) & \text{for } t \text{ odd} \end{cases} . \quad (\text{AFP Dual})$$

822 Thus, similar to (AFP Dual), the subspace iterates of Alternating Fictitious Play can be expressed with  
 823 respect to a predicted payoff vector  $\tilde{z}^{t+1}$ . Now, due to the alternating play setting, the position of this  
 824 predicted vector depends on the parity of  $t$ .

825 **Overall proof strategy.** Given the equivalence between  $\text{Reg}^{\text{alt}}(T)$  and  $\Psi(y^{T+1})$  from Proposi-  
 826 tion D.5, and on the equivalence between  $\Psi(y^{T+1})$  and  $\psi(z^{T+1})$  from D.6, to prove Theorem 3.2, it  
 827 suffices to establish the following lower bound on the energy  $\psi(z^{T+1})$ :

828 **Lemma D.7.** *Assume the setting of Theorem 3.2, and let  $\{z^t\}$  be the dual iterates of (AFP Dual).*  
 829 *Then  $\psi(z^{T+1}) \geq \Omega(\sqrt{T})$ .*

830 To prove Lemma D.7, we introduce a *phase structure* (in similar spirit to the analysis of Lazarsfeld  
 831 et al. (2025)), where each phase tracks a subsequence of consecutive time steps where the iterates  
 832  $\{w^t\}$  are at the same primal vertex. Formally, we define:

833 **Definition D.8.** Let  $\{w^t\}$  be the primal iterates from (37), and fix  $t_0 = 2$ . For  $k \geq 1$ , let  $t_k :=$   
 834  $\min\{t > t_{k-1} : w^t \neq w^{t_{k-1}}\}$ . Then define Phase  $k$  as the subsequence of iterates from times  
 835  $t = t_k, t_k + 1, \dots, t_{k+1} - 1$ , and let  $\tau_k = t_{k+1} - t_k$  be the length of the phase. Let  $K \geq 0$  denote  
 836 the total number of phases in  $T$  rounds such that  $T = \sum_{k=0}^K \tau_k$ .

837 Using the phase setup of Definition D.8, the core technical component of proving Lemma D.7 is to  
 838 establish the following proposition:

839 **Proposition D.9.** *Assume the setting of Theorem 3.2. Then for each Phase  $k = 1, \dots, K$ , the*  
 840 *following hold:*

841 (i)  $\psi(z^{t_k}) \leq \psi(z^{t_{k-1}}) + 2$

842 (ii)  $\tau_k = \Theta(\psi(z^{t_k}))$ .

843 Moreover, for at least  $K/2$  phases  $k$ , it holds that (iii)  $\psi(z^{t_k}) \geq \psi(z^{t_{k-1}}) + 1$ .

844 The proof of Proposition D.9 is developed in Section D.3.1. Granting the claims of the proposition as  
 845 true for now, we give the proof of Lemma D.7 (and thus also of Theorem 3.2):

846 *Proof (of Lemma D.7).* By claim (iii) of Proposition D.9, the energy  $\psi$  is strictly increasing in at  
 847 least  $K/2$  phases, and thus

$$\psi(z^{T+1}) \geq \frac{K}{2} . \quad (38)$$

848 To prove the statement of the lemma, it then suffices to derive a lower bound on  $K$ . For this, recall by  
 849 Definition D.8 that  $T = \sum_{k=1}^K \tau_k$ . Moreover, combining claims (i) and (ii) of Proposition D.9, we  
 850 find for all  $k$  that  $\tau_k = \Theta(\psi(z^{t_k})) \leq \Theta(\psi(z^{t_{k-1}}) + 2) \leq \Theta(k)$ . Combining these pieces, we have

$$T = \sum_{k=1}^K \tau_k \leq \sum_{k=1}^K \Theta(k) \leq \Theta(K^2) . \quad (39)$$

851 Thus  $K^2 \geq \Omega(T) \implies K \geq \Omega(\sqrt{T})$ . Substituting into (38), we conclude  $\psi(z^{T+1}) \geq \Omega(\sqrt{T})$ .  $\square$

### 852 D.3.1 Proof of Proposition D.9

853 We now prove the claims of Proposition D.9. For this, we start by establishing the following invariant  
854 between the dual iterates  $z^{t-1}, z^t, z^{t+1}$  and the predicted vector  $\tilde{z}^{t+1}$ .

855 **Analysis of initial phases.** We begin by computing the dual iterates during the first two phases,  
856 which helps to both give intuition for the energy growth behavior of Alternating FP, as well as to  
857 streamline the remainder of the proof. For this, recall that initially  $x_2^1 = (p, 1-p) \in \Delta_2$  for irrational  
858  $p \in (3/4, 1)$ , and that  $y_1^2 = 0 \in \mathbb{R}^2$ .

859 It follows by definition of (AFP) at time  $t = 2$  that  $y_1^2 = y_1^2 = 0 \in \mathbb{R}^2$  and  $y_2^2 = -A^\top x_1^1 =$   
860  $(-(2p-1), (2p-1))$ , and that  $x_1^2 = x_1^1 \in \Delta_2$  and  $x_2^2 = (0, 1) \in \Delta_2$ . Then, at  $t = 3$ , we further  
861 have  $y_1^3 = y_1^2 + Ax_2^2 = (-1, 1)$  and  $y_2^3 = y_2^2 - A^\top x_1^1 = 2 \cdot y_2^2$ .

862 Then for  $t \geq 3$ , switching to the equivalent, lower-dimensional iterates  $\{w^t\}$  and  $\{z^t\}$ , we can further  
863 directly compute (by definition of (AFP Dual)):

$$\begin{aligned} (t=3) \quad & \begin{cases} z^3 = (-1, -2(2p-1)) \in P_1 \\ \tilde{z}^4 = (z_1^3, z_2^2) = (-1, -(2p-1)) \in P_1 \end{cases} & w^3 = Q(\tilde{z}^4) = e_1 \\ (t=4) \quad & \begin{cases} z^4 = z^3 + (-1, 1) = (-2, -4p+3) \in P_1 \\ \tilde{z}^5 = (z_1^3, z_2^4) = (-1, -4p+3) \in P_1 \end{cases} & w^4 = Q(\tilde{z}^5) = e_1 \\ (t=5) \quad & \begin{cases} z^5 = z^4 + (-1, 1) = (-3, -4p+4) \in P_2 \\ \tilde{z}^6 = (z_1^5, z_2^4) = (-3, -4p+3) \in P_1 \end{cases} & w^5 = Q(\tilde{z}^6) = e_1 \\ (t=6) \quad & \begin{cases} z^6 = z^5 + (-1, 1) = (-4, -4p+5) \in P_2 \\ \tilde{z}^7 = (z_1^5, z_2^6) = (-3, -4p+5) \in P_2 \end{cases} & w^6 = Q(\tilde{z}^7) = e_2. \end{aligned}$$

864 Observe by Definition D.8 and the calculations above that Phase 1 begins at step  $t_1 = 3$ , and Phase 2  
865 begins at phase  $t_2 = 6$ . Moreover,  $\Delta\psi(z^5) = \Delta\psi(z^6) = 1$ , meaning  $\psi(z^{t_2}) - \psi(z^{t_1}) = 2 > 0$ .

866 This strictly increasing energy growth between phases stems from the geometry of the predicted  
867 payoff vectors: in this instance, under Alternating Fictitious Play, when  $z^t, z^{t-1} \in P_1$  and  $z^t$  is near  
868 the boundary  $P_{1 \sim 2}$ , the predicted vector  $\tilde{z}^{t+1}$  always remains in  $P_1$  and fails to “predict” the next  
869 region  $P_2$ . This results in strictly increasing energy growth when  $z^{t+1} \in P_2$ . This positive energy  
870 growth behavior near the boundary regions is the key difference between Alternating and Optimistic  
871 Fictitious Play (c.f., the invariants and energy growth claims of Lemma 4.10).

872 **Cycling invariants.** By continuing to compute the dual iterates  $\{z^t\}$ , we arrive at the following  
873 invariants, which establish a certain cycling behavior through the regions of  $\hat{\mathcal{P}}$ . Specifically, it  
874 follows inductively that  $z^{t-1}$  and  $z^t$  must fall under one of the following cases (which subsequently  
875 determines  $\tilde{z}^{t+1}, z^{t+1}$ , and the energy growth  $\Delta\psi(z^t)$ ):

- 876 • **Case 1:**  $z^{t-1}, z^t \in P_i$ , and  $z^t - z^{t-1} = S_i$ .  
877 Then  $\tilde{z}^{t+1} \in P_i$ , and either  $z^{t+1} \in P_{i+1}$  with  $\Delta\psi(z^t) = 1$ , or  $z^t \in P_i$  with  $\Delta\psi(z^t) = 0$ .
- 878 • **Case 2:**  $z^{t-1} \in P_i, z^t \in P_{i+1}$ , and  $z^t = z^{t-1} + S_i$ .  
879 Then  $z^{t+1} \in P_{i+1}$ , and either  $\tilde{z}^{t+1} \in P_i$  and  $\Delta\psi(z^t) = 1$ , or  $\tilde{z}^{t+1} \in P_{i+1}$  and  $\Delta\psi(z^t) = 0$ .
- 880 • **Case 3:**  $z^{t-1} \in P_i, z^t \in P_{i \sim (i+1)}$  and  $z^t = z^{t-1} + S_i$ .  
881 If  $\tilde{z}^{t+1} \in P_i$ , then  $z^{t+1} \in P_{i+1}$  and  $\Delta\psi(z^t) = 1$ . If  $\tilde{z}^{t+1} \in P_{i \sim (i+1)}$ , then also  $z^{t+1} \in P_{i+1}$ ,  
882 with  $\Delta\psi(z^t) \in \{0, 1\}$  depending on the tiebreaking of Q.
- 883 • **Case 4:**  $z^{t-1} \in P_{i \sim (i+1)}$  and  $z^t \in P_{i+1}$ . If  $\tilde{z}^{t+1} \in P_{i \sim (i+1)}$ , then  $z^{t+1} \in P_{i+1}$ , and  
884  $\Delta\psi(z^t) \in \{0, 1\}$  depending on the tiebreaking of Q. If  $\tilde{z}^{t+1} \in P_{i+1}$ , then  $z^{t+1} \in P_{i+1}$  and  
885  $\Delta\psi(z^t) = 0$ .

886 Note that the cases above account for (a) the variability of  $\tilde{z}^{t+1}$  depending on the parity of  $t$ , and (b)  
887 any variability in  $z^{t+1}$  depending on the tiebreaking decision encoded in Q. In summary, we deduce  
888 from the four cases above the following consequences:

1. Between phases, energy strictly increases in at most 2 iterations. By definition of the energy function  $\psi$  under Matching Pennies, each one-step increase has magnitude 1, and thus  $\psi(z^{t_k}) - \psi(z^{t_{k-1}}) \leq 2$ , which proves claim (i) of the proposition.
2. Again using the definition of  $\psi$  under Matching Pennies, we have  $\psi(z^t) = \|z^t\|_1$ . The cases above then imply that each  $\tau_k = \|z^t\|_1 + c_k$  (for some absolute constant  $c_k$ ), and it follows that  $\tau_k = \Theta(\psi(z^t))$ , which proves claim (ii) of the proposition.
3. Finally, using the definition of  $S$  under Matching Pennies, along with the fact that initially  $z_1^2 = 0$ , it holds that each  $z_1^t$  is integral. Thus between regions  $P_2$  and  $P_3$ , and between  $P_4$  and  $P_1$ , one dual iterate will always lie on the boundary  $P_{2 \sim 3}$  or  $P_{3 \sim 4}$ , respectively. In these cases, depending on the tiebreaking rule of Q, the change in energy may be zero when crossing between regions of  $\mathcal{P}$ . On the other hand, due to the initialization  $x_1^1 = (p, 1 - p)$  for irrational  $p \in (3/4, 1)$ , it follows for  $t \geq 2$  that all  $z_2^t$  are irrational. Thus no tiebreaking occurs when the dual iterates transition between regions  $P_1$  and  $P_2$  and between  $P_3$  and  $P_4$ . Thus under transitions between these phases (which by symmetry amount for at least  $\Omega(K/2)$  total phases), we have by the cases above that energy is strictly increasing by at least 1. This proves claim (iii) of the proposition.  $\square$

## E Additional Experimental Results

In this section, we provide more details on the experimental evaluations from Figure 1 and Section 5, and we also present additional experimental results. The goal of these experiments is to give further empirical evidence that the constant regret guarantee of Theorem 3.5 for two-strategy games also holds in higher dimensions.

### E.1 Details on Experimental Setup

First, we note that all code used to run experiments can be found in the supplementary material. In this paper, all experiments were run locally on a single personal computer.

**Families of payoff matrices.** Aside from the (Matching Pennies) game, our experimental evaluations of Fictitious Play variants are performed on three high-dimensional families of payoff matrices:

- **Identity matrices:** Here, the payoff matrix is the  $n \times n$  identity matrix  $I_n$  (i.e., the diagonal matrix with diagonal entries all 1). Recall that for standard FP, Abernethy et al. (2021a) established an  $O(\sqrt{T})$  regret bound using fixed lexicographical tiebreaking.
- **Generalized Rock-Paper-Scissors (RPS) matrices:** Here, the payoff matrix is the  $n \times n$  generalization of the classic three-strategy Rock-Paper-Scissors game. Specifically,  $A$  is the matrix with entries  $A_{i,j}$  given by

$$A_{i,j} := \begin{cases} -1 & \text{if } j = i + 1 \pmod{n} \\ 1 & \text{if } j = i - 1 \pmod{n} \\ 0 & \text{otherwise} \end{cases} \quad \text{for all } i, j \in [n]. \quad (40)$$

For standard FP, Lazarsfeld et al. (2025) established an  $O(\sqrt{T})$  regret bound for all such RPS matrices (using any tiebreaking rule), including when  $A$  is scaled by a constant, and when the non-zero entries have non-uniform weights.

- **Random [0,1] matrices:** We also consider  $n \times n$  payoff matrices with uniformly random entries in  $[0, 1]$ . For these payoff matrices, there are no existing  $O(\sqrt{T})$  regret bounds for standard FP.

**Tiebreaking rules.** To evaluate the robustness of regret guarantees to the tiebreaking method, we run the FP variants using both (a) fixed *lexicographical tiebreaking* (e.g., as in Abernethy et al. (2021a)) and (b) uniformly *random tiebreaking* (e.g., over the entries of the argmax set).

**Random initializations.** To evaluate the robustness of regret guarantees to the players' initial strategies, we evaluated the Fictitious Play variants over multiple random initializations of  $x_1^0, x_2^0 \in \Delta_n$  (for the Alternating FP initialization from Figure 1, note that the stated initialization is for

933  $x_1^1 \in \Delta_n$ , as in the notation of Definition D.1). To generate a random initialization  $x \in \Delta_n$ , we  
 934 sample  $v \in [0, 1]^n$  with independent, uniformly random entries, and normalize  $x := v/\|v\|_1$ .

## 935 E.2 Empirical Regret Comparisons of Fictitious Play and Optimistic Fictitious Play

936 **Regret comparisons under randomized tiebreaking.** In Table 2 of Section 5, we presented regret  
 937 comparisons of Optimistic FP and standard FP on the three families of payoff matrices described  
 938 above in Section E.1, using *fixed lexicographical tiebreaking*. In Table 3, we show the results of an  
 939 identical experimental setup, now using randomized tiebreaking. As in Table 2, the entries of Table 3  
 940 report average empirical regrets (and standard deviations) over 100 random initializations, where for  
 941 each initialization, each algorithm was run for  $T = 10000$  iterations.

| Dimension:           | 15×15       |           | 25×25       |            | 50×50       |            |
|----------------------|-------------|-----------|-------------|------------|-------------|------------|
| Payoff Matrix        | FP          | OFP       | FP          | OFP        | FP          | OFP        |
| <b>Identity</b>      | 154.4 ± 4.2 | 8.4 ± 1.7 | 162.3 ± 3.4 | 12.9 ± 1.6 | 166.9 ± 2.2 | 25.0 ± 2.3 |
| <b>RPS</b>           | 235.2 ± 6.6 | 2.8 ± 0.5 | 241.5 ± 6.1 | 3.2 ± 0.9  | 242.9 ± 5.6 | 2.6 ± 0.8  |
| <b>Random [0, 1]</b> | 93.4 ± 5.0  | 2.7 ± 0.6 | 137.1 ± 6.1 | 7.0 ± 1.1  | 176.2 ± 6.3 | 12.2 ± 1.4 |

Table 3: Empirical regret of FP and OFP using randomized tiebreaking. Each entry reports an average and standard deviation (over 100 random initializations) of total regret after  $T = 10000$  steps.

942 As in Table 2, the results of Table 3 similarly show that Optimistic FP empirically obtains bounded  
 943 regret compared to the roughly  $O(\sqrt{T})$  regret of standard FP for each payoff matrix and dimension.

944 **Additional plots from fixed initializations.** To further compare the empirical regrets of standard  
 945 FP and Optimistic FP, we present plots of the two algorithms run from fixed initializations, similar to  
 946 Figure 1 from Section 1 (which also included a comparison with AFP). In each plot, we consider  
 947 the three families of identity, RPS, and random matrices described earlier in Section E.1. Note in  
 948 particular that for the RPS game (including in Figure 1 of Section 1), for better visual comparison  
 949 with the other games, we use the payoff matrix specified in (40), but scaled by the constant  $2/3$ .

950 Figures 4, 5, and 6 show these comparisons for  $15 \times 15$  and  $25 \times 25$  matrices, using both randomized  
 951 and lexicographical tiebreaking. In each instance, we again observe that Optimistic FP has bounded  
 952 empirical regret compared to the  $\sqrt{T}$  regret of standard FP.

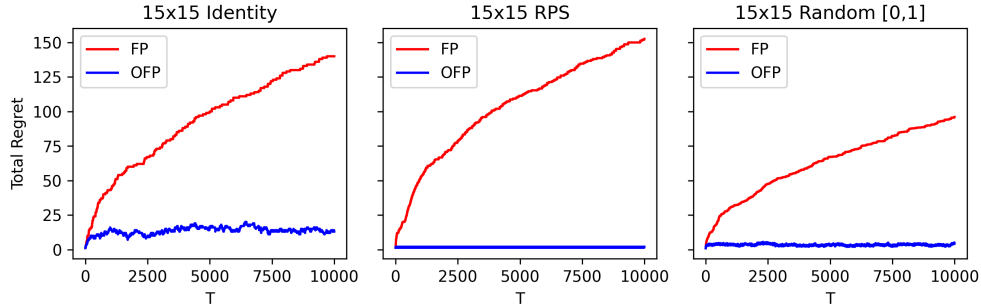

Figure 4: Empirical regret of standard FP and Optimistic FP (OFP) using **randomized tiebreaking** on three  $15 \times 15$  payoff matrices. For each payoff matrix, each algorithm was initialized from  $x_1^0 = e_1, x_2^0 = e_n$  and run for  $T = 10000$  iterations.

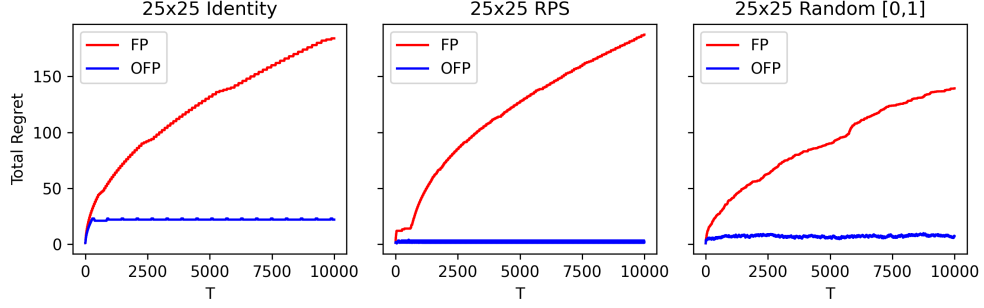

Figure 5: Empirical regret of standard FP and Optimistic FP (OFP) using **lexicographical tiebreaking** on three  $25 \times 25$  payoff matrices. For each payoff matrix, each algorithm was initialized from  $x_1^0 = e_1, x_2^0 = e_n$  and run for  $T = 10000$  iterations.

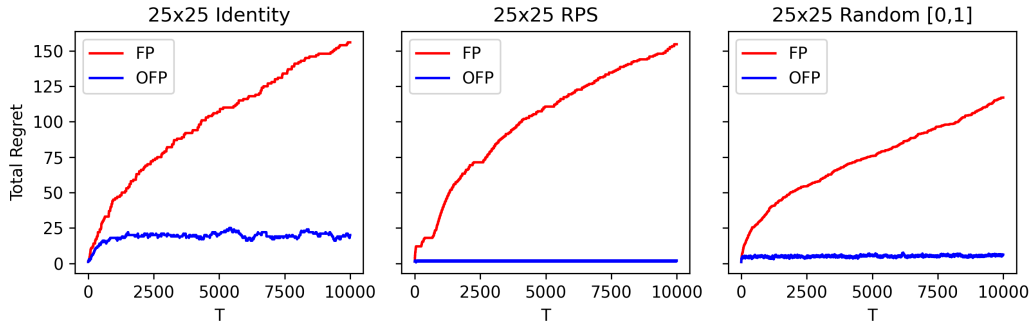

Figure 6: Empirical regret of standard FP and Optimistic FP (OFP) using **randomized tiebreaking** on three  $25 \times 25$  payoff matrices. For each payoff matrix, each algorithm was initialized from  $x_1^0 = e_1, x_2^0 = e_n$  and run for  $T = 10000$  iterations.

## NeurIPS Paper Checklist

### 1. Claims

Question: Do the main claims made in the abstract and introduction accurately reflect the paper's contributions and scope?

Answer:

[Yes]

Justification:

Our abstract and introduction introduce the new regret bounds of our work and also mention the limitations of the low-dimensional setting.

Guidelines:

- The answer NA means that the abstract and introduction do not include the claims made in the paper.
- The abstract and/or introduction should clearly state the claims made, including the contributions made in the paper and important assumptions and limitations. A No or NA answer to this question will not be perceived well by the reviewers.
- The claims made should match theoretical and experimental results, and reflect how much the results can be expected to generalize to other settings.
- It is fine to include aspirational goals as motivation as long as it is clear that these goals are not attained by the paper.

### 2. Limitations

Question: Does the paper discuss the limitations of the work performed by the authors?

Answer:

[Yes]

Justification:

Yes, throughout the Introduction (Section 1) and Discussion (Section 5), we mention and discuss the limitation of the low-dimensional nature of our main theoretical guarantees.

Guidelines:

- The answer NA means that the paper has no limitation while the answer No means that the paper has limitations, but those are not discussed in the paper.
- The authors are encouraged to create a separate "Limitations" section in their paper.
- The paper should point out any strong assumptions and how robust the results are to violations of these assumptions (e.g., independence assumptions, noiseless settings, model well-specification, asymptotic approximations only holding locally). The authors should reflect on how these assumptions might be violated in practice and what the implications would be.
- The authors should reflect on the scope of the claims made, e.g., if the approach was only tested on a few datasets or with a few runs. In general, empirical results often depend on implicit assumptions, which should be articulated.
- The authors should reflect on the factors that influence the performance of the approach. For example, a facial recognition algorithm may perform poorly when image resolution is low or images are taken in low lighting. Or a speech-to-text system might not be used reliably to provide closed captions for online lectures because it fails to handle technical jargon.
- The authors should discuss the computational efficiency of the proposed algorithms and how they scale with dataset size.
- If applicable, the authors should discuss possible limitations of their approach to address problems of privacy and fairness.
- While the authors might fear that complete honesty about limitations might be used by reviewers as grounds for rejection, a worse outcome might be that reviewers discover limitations that aren't acknowledged in the paper. The authors should use their best judgment and recognize that individual actions in favor of transparency play an important role in developing norms that preserve the integrity of the community. Reviewers will be specifically instructed to not penalize honesty concerning limitations.



### 3. Theory assumptions and proofs

Question: For each theoretical result, does the paper provide the full set of assumptions and a complete (and correct) proof?

Answer:

[Yes]

Justification:

Yes, the full proofs of all our theoretical results are developed in the appendix sections of our paper. We also give proof sketches of main results in the main body of the paper.

Guidelines:

- The answer NA means that the paper does not include theoretical results.
- All the theorems, formulas, and proofs in the paper should be numbered and cross-referenced.
- All assumptions should be clearly stated or referenced in the statement of any theorems.
- The proofs can either appear in the main paper or the supplemental material, but if they appear in the supplemental material, the authors are encouraged to provide a short proof sketch to provide intuition.
- Inversely, any informal proof provided in the core of the paper should be complemented by formal proofs provided in appendix or supplemental material.
- Theorems and Lemmas that the proof relies upon should be properly referenced.

### 4. Experimental result reproducibility

Question: Does the paper fully disclose all the information needed to reproduce the main experimental results of the paper to the extent that it affects the main claims and/or conclusions of the paper (regardless of whether the code and data are provided or not)?

Answer: [Yes]

Justification:

Yes, we describe the full details of our experimental evaluation in Section E. We provide the scripts used to run the experiments in the supplemental material.

Guidelines:

- The answer NA means that the paper does not include experiments.
- If the paper includes experiments, a No answer to this question will not be perceived well by the reviewers: Making the paper reproducible is important, regardless of whether the code and data are provided or not.
- If the contribution is a dataset and/or model, the authors should describe the steps taken to make their results reproducible or verifiable.
- Depending on the contribution, reproducibility can be accomplished in various ways. For example, if the contribution is a novel architecture, describing the architecture fully might suffice, or if the contribution is a specific model and empirical evaluation, it may be necessary to either make it possible for others to replicate the model with the same dataset, or provide access to the model. In general, releasing code and data is often one good way to accomplish this, but reproducibility can also be provided via detailed instructions for how to replicate the results, access to a hosted model (e.g., in the case of a large language model), releasing of a model checkpoint, or other means that are appropriate to the research performed.
- While NeurIPS does not require releasing code, the conference does require all submissions to provide some reasonable avenue for reproducibility, which may depend on the nature of the contribution. For example
  - (a) If the contribution is primarily a new algorithm, the paper should make it clear how to reproduce that algorithm.
  - (b) If the contribution is primarily a new model architecture, the paper should describe the architecture clearly and fully.
  - (c) If the contribution is a new model (e.g., a large language model), then there should either be a way to access this model for reproducing the results or a way to reproduce the model (e.g., with an open-source dataset or instructions for how to construct the dataset).

1060 (d) We recognize that reproducibility may be tricky in some cases, in which case  
1061 authors are welcome to describe the particular way they provide for reproducibility.  
1062 In the case of closed-source models, it may be that access to the model is limited in  
1063 some way (e.g., to registered users), but it should be possible for other researchers  
1064 to have some path to reproducing or verifying the results.

## 1065 5. Open access to data and code

1066 Question: Does the paper provide open access to the data and code, with sufficient instruc-  
1067 tions to faithfully reproduce the main experimental results, as described in supplemental  
1068 material?

1069 Answer: [Yes]

1070 Justification:

1071 Yes, we include the code used to perform our experimental evaluation in the supplemental  
1072 material.

1073 Guidelines:

- 1074 • The answer NA means that paper does not include experiments requiring code.
- 1075 • Please see the NeurIPS code and data submission guidelines ([https://nips.cc/  
1076 public/guides/CodeSubmissionPolicy](https://nips.cc/public/guides/CodeSubmissionPolicy)) for more details.
- 1077 • While we encourage the release of code and data, we understand that this might not be  
1078 possible, so “No” is an acceptable answer. Papers cannot be rejected simply for not  
1079 including code, unless this is central to the contribution (e.g., for a new open-source  
1080 benchmark).
- 1081 • The instructions should contain the exact command and environment needed to run to  
1082 reproduce the results. See the NeurIPS code and data submission guidelines ([https:  
1083 //nips.cc/public/guides/CodeSubmissionPolicy](https://nips.cc/public/guides/CodeSubmissionPolicy)) for more details.
- 1084 • The authors should provide instructions on data access and preparation, including how  
1085 to access the raw data, preprocessed data, intermediate data, and generated data, etc.
- 1086 • The authors should provide scripts to reproduce all experimental results for the new  
1087 proposed method and baselines. If only a subset of experiments are reproducible, they  
1088 should state which ones are omitted from the script and why.
- 1089 • At submission time, to preserve anonymity, the authors should release anonymized  
1090 versions (if applicable).
- 1091 • Providing as much information as possible in supplemental material (appended to the  
1092 paper) is recommended, but including URLs to data and code is permitted.

## 1093 6. Experimental setting/details

1094 Question: Does the paper specify all the training and test details (e.g., data splits, hyper-  
1095 parameters, how they were chosen, type of optimizer, etc.) necessary to understand the  
1096 results?

1097 Answer:

1098 [Yes]

1099 Justification:

1100 Yes, we specify all details related to our experimental evaluation in Section E.

1101 Guidelines:

- 1102 • The answer NA means that the paper does not include experiments.
- 1103 • The experimental setting should be presented in the core of the paper to a level of detail  
1104 that is necessary to appreciate the results and make sense of them.
- 1105 • The full details can be provided either with the code, in appendix, or as supplemental  
1106 material.

## 1107 7. Experiment statistical significance

1108 Question: Does the paper report error bars suitably and correctly defined or other appropriate  
1109 information about the statistical significance of the experiments?

1110 Answer:

1111 [Yes]

1112 Justification:  
 1113 Yes, in the tables report empirical regret (e.g., Table 2 and Table 3), we report averages and  
 1114 standard deviations over the 100 random initializations.

1115 Guidelines:

- 1116 • The answer NA means that the paper does not include experiments.
- 1117 • The authors should answer "Yes" if the results are accompanied by error bars, confi-  
 1118 dence intervals, or statistical significance tests, at least for the experiments that support  
 1119 the main claims of the paper.
- 1120 • The factors of variability that the error bars are capturing should be clearly stated (for  
 1121 example, train/test split, initialization, random drawing of some parameter, or overall  
 1122 run with given experimental conditions).
- 1123 • The method for calculating the error bars should be explained (closed form formula,  
 1124 call to a library function, bootstrap, etc.)
- 1125 • The assumptions made should be given (e.g., Normally distributed errors).
- 1126 • It should be clear whether the error bar is the standard deviation or the standard error  
 1127 of the mean.
- 1128 • It is OK to report 1-sigma error bars, but one should state it. The authors should  
 1129 preferably report a 2-sigma error bar than state that they have a 96% CI, if the hypothesis  
 1130 of Normality of errors is not verified.
- 1131 • For asymmetric distributions, the authors should be careful not to show in tables or  
 1132 figures symmetric error bars that would yield results that are out of range (e.g. negative  
 1133 error rates).
- 1134 • If error bars are reported in tables or plots, The authors should explain in the text how  
 1135 they were calculated and reference the corresponding figures or tables in the text.

1136 **8. Experiments compute resources**

1137 Question: For each experiment, does the paper provide sufficient information on the com-  
 1138 puter resources (type of compute workers, memory, time of execution) needed to reproduce  
 1139 the experiments?

1140 Answer:  
 1141 [Yes]

1142 Justification:  
 1143 Yes, in Section E we provide full details on the computer resources needed to reproduce the  
 1144 experiment (which are minimal).

1145 Guidelines:

- 1146 • The answer NA means that the paper does not include experiments.
- 1147 • The paper should indicate the type of compute workers CPU or GPU, internal cluster,  
 1148 or cloud provider, including relevant memory and storage.
- 1149 • The paper should provide the amount of compute required for each of the individual  
 1150 experimental runs as well as estimate the total compute.
- 1151 • The paper should disclose whether the full research project required more compute  
 1152 than the experiments reported in the paper (e.g., preliminary or failed experiments that  
 1153 didn't make it into the paper).

1154 **9. Code of ethics**

1155 Question: Does the research conducted in the paper conform, in every respect, with the  
 1156 NeurIPS Code of Ethics <https://neurips.cc/public/EthicsGuidelines>?

1157 Answer:  
 1158 [Yes]

1159 Justification:  
 1160 Yes, the research conducted in this paper conforms, in every respect, with the NeurIPS Code  
 1161 of Ethics.

1162 Guidelines:

- 1163 • The answer NA means that the authors have not reviewed the NeurIPS Code of Ethics.

- If the authors answer No, they should explain the special circumstances that require a deviation from the Code of Ethics.
- The authors should make sure to preserve anonymity (e.g., if there is a special consideration due to laws or regulations in their jurisdiction).

## 10. Broader impacts

Question: Does the paper discuss both potential positive societal impacts and negative societal impacts of the work performed?

Answer:

[Yes]

Justification:

Yes, in Section 5 we mention potential impacts of our work.

Guidelines:

- The answer NA means that there is no societal impact of the work performed.
- If the authors answer NA or No, they should explain why their work has no societal impact or why the paper does not address societal impact.
- Examples of negative societal impacts include potential malicious or unintended uses (e.g., disinformation, generating fake profiles, surveillance), fairness considerations (e.g., deployment of technologies that could make decisions that unfairly impact specific groups), privacy considerations, and security considerations.
- The conference expects that many papers will be foundational research and not tied to particular applications, let alone deployments. However, if there is a direct path to any negative applications, the authors should point it out. For example, it is legitimate to point out that an improvement in the quality of generative models could be used to generate deepfakes for disinformation. On the other hand, it is not needed to point out that a generic algorithm for optimizing neural networks could enable people to train models that generate Deepfakes faster.
- The authors should consider possible harms that could arise when the technology is being used as intended and functioning correctly, harms that could arise when the technology is being used as intended but gives incorrect results, and harms following from (intentional or unintentional) misuse of the technology.
- If there are negative societal impacts, the authors could also discuss possible mitigation strategies (e.g., gated release of models, providing defenses in addition to attacks, mechanisms for monitoring misuse, mechanisms to monitor how a system learns from feedback over time, improving the efficiency and accessibility of ML).

## 11. Safeguards

Question: Does the paper describe safeguards that have been put in place for responsible release of data or models that have a high risk for misuse (e.g., pretrained language models, image generators, or scraped datasets)?

Answer:

[NA]

Justification:

Our paper poses no such risks.

Guidelines:

- The answer NA means that the paper poses no such risks.
- Released models that have a high risk for misuse or dual-use should be released with necessary safeguards to allow for controlled use of the model, for example by requiring that users adhere to usage guidelines or restrictions to access the model or implementing safety filters.
- Datasets that have been scraped from the Internet could pose safety risks. The authors should describe how they avoided releasing unsafe images.
- We recognize that providing effective safeguards is challenging, and many papers do not require this, but we encourage authors to take this into account and make a best faith effort.

|      |                                                                                                                                 |
|------|---------------------------------------------------------------------------------------------------------------------------------|
| 1217 | <b>12. Licenses for existing assets</b>                                                                                         |
| 1218 | Question: Are the creators or original owners of assets (e.g., code, data, models), used in                                     |
| 1219 | the paper, properly credited and are the license and terms of use explicitly mentioned and                                      |
| 1220 | properly respected?                                                                                                             |
| 1221 | Answer:                                                                                                                         |
| 1222 | [NA]                                                                                                                            |
| 1223 | Justification:                                                                                                                  |
| 1224 | Our paper does not use existing assets.                                                                                         |
| 1225 | Guidelines:                                                                                                                     |
| 1226 | • The answer NA means that the paper does not use existing assets.                                                              |
| 1227 | • The authors should cite the original paper that produced the code package or dataset.                                         |
| 1228 | • The authors should state which version of the asset is used and, if possible, include a                                       |
| 1229 | URL.                                                                                                                            |
| 1230 | • The name of the license (e.g., CC-BY 4.0) should be included for each asset.                                                  |
| 1231 | • For scraped data from a particular source (e.g., website), the copyright and terms of                                         |
| 1232 | service of that source should be provided.                                                                                      |
| 1233 | • If assets are released, the license, copyright information, and terms of use in the                                           |
| 1234 | package should be provided. For popular datasets, <a href="https://paperswithcode.com/datasets">paperswithcode.com/datasets</a> |
| 1235 | has curated licenses for some datasets. Their licensing guide can help determine the                                            |
| 1236 | license of a dataset.                                                                                                           |
| 1237 | • For existing datasets that are re-packaged, both the original license and the license of                                      |
| 1238 | the derived asset (if it has changed) should be provided.                                                                       |
| 1239 | • If this information is not available online, the authors are encouraged to reach out to                                       |
| 1240 | the asset's creators.                                                                                                           |
| 1241 | <b>13. New assets</b>                                                                                                           |
| 1242 | Question: Are new assets introduced in the paper well documented and is the documentation                                       |
| 1243 | provided alongside the assets?                                                                                                  |
| 1244 | Answer:                                                                                                                         |
| 1245 | [NA]                                                                                                                            |
| 1246 | Justification:                                                                                                                  |
| 1247 | This paper does not release new assets.                                                                                         |
| 1248 | Guidelines:                                                                                                                     |
| 1249 | • The answer NA means that the paper does not release new assets.                                                               |
| 1250 | • Researchers should communicate the details of the dataset/code/model as part of their                                         |
| 1251 | submissions via structured templates. This includes details about training, license,                                            |
| 1252 | limitations, etc.                                                                                                               |
| 1253 | • The paper should discuss whether and how consent was obtained from people whose                                               |
| 1254 | asset is used.                                                                                                                  |
| 1255 | • At submission time, remember to anonymize your assets (if applicable). You can either                                         |
| 1256 | create an anonymized URL or include an anonymized zip file.                                                                     |
| 1257 | <b>14. Crowdsourcing and research with human subjects</b>                                                                       |
| 1258 | Question: For crowdsourcing experiments and research with human subjects, does the paper                                        |
| 1259 | include the full text of instructions given to participants and screenshots, if applicable, as                                  |
| 1260 | well as details about compensation (if any)?                                                                                    |
| 1261 | Answer:                                                                                                                         |
| 1262 | [NA]                                                                                                                            |
| 1263 | Justification:                                                                                                                  |
| 1264 | The paper does not involve crowdsourcing nor research with human subjects.                                                      |
| 1265 | Guidelines:                                                                                                                     |
| 1266 | • The answer NA means that the paper does not involve crowdsourcing nor research with                                           |
| 1267 | human subjects.                                                                                                                 |

|      |     |                                                                                                                                    |
|------|-----|------------------------------------------------------------------------------------------------------------------------------------|
| 1268 |     |                                                                                                                                    |
| 1269 |     | • Including this information in the supplemental material is fine, but if the main contribu-                                       |
| 1270 |     | tion of the paper involves human subjects, then as much detail as possible should be                                               |
| 1271 |     | included in the main paper.                                                                                                        |
| 1272 |     | • According to the NeurIPS Code of Ethics, workers involved in data collection, curation,                                          |
| 1273 |     | or other labor should be paid at least the minimum wage in the country of the data                                                 |
|      |     | collector.                                                                                                                         |
| 1274 | 15. | <b>Institutional review board (IRB) approvals or equivalent for research with human</b>                                            |
| 1275 |     | <b>subjects</b>                                                                                                                    |
| 1276 |     | Question: Does the paper describe potential risks incurred by study participants, whether                                          |
| 1277 |     | such risks were disclosed to the subjects, and whether Institutional Review Board (IRB)                                            |
| 1278 |     | approvals (or an equivalent approval/review based on the requirements of your country or                                           |
| 1279 |     | institution) were obtained?                                                                                                        |
| 1280 |     | Answer:                                                                                                                            |
| 1281 |     | [NA]                                                                                                                               |
| 1282 |     | Justification:                                                                                                                     |
| 1283 |     | This paper does not involve crowdsourcing nor research with human subjects.                                                        |
| 1284 |     | Guidelines:                                                                                                                        |
| 1285 |     | • The answer NA means that the paper does not involve crowdsourcing nor research with                                              |
| 1286 |     | human subjects.                                                                                                                    |
| 1287 |     | • Depending on the country in which research is conducted, IRB approval (or equivalent)                                            |
| 1288 |     | may be required for any human subjects research. If you obtained IRB approval, you                                                 |
| 1289 |     | should clearly state this in the paper.                                                                                            |
| 1290 |     | • We recognize that the procedures for this may vary significantly between institutions                                            |
| 1291 |     | and locations, and we expect authors to adhere to the NeurIPS Code of Ethics and the                                               |
| 1292 |     | guidelines for their institution.                                                                                                  |
| 1293 |     | • For initial submissions, do not include any information that would break anonymity (if                                           |
| 1294 |     | applicable), such as the institution conducting the review.                                                                        |
| 1295 | 16. | <b>Declaration of LLM usage</b>                                                                                                    |
| 1296 |     | Question: Does the paper describe the usage of LLMs if it is an important, original, or                                            |
| 1297 |     | non-standard component of the core methods in this research? Note that if the LLM is used                                          |
| 1298 |     | only for writing, editing, or formatting purposes and does not impact the core methodology,                                        |
| 1299 |     | scientific rigorousness, or originality of the research, declaration is not required.                                              |
| 1300 |     | Answer:                                                                                                                            |
| 1301 |     | [NA]                                                                                                                               |
| 1302 |     | Justification:                                                                                                                     |
| 1303 |     | The research in this paper does not involve LLMs as any important, original, or non-standard                                       |
| 1304 |     | component.                                                                                                                         |
| 1305 |     | Guidelines:                                                                                                                        |
| 1306 |     | • The answer NA means that the core method development in this research does not                                                   |
| 1307 |     | involve LLMs as any important, original, or non-standard components.                                                               |
| 1308 |     | • Please refer to our LLM policy ( <a href="https://neurips.cc/Conferences/2025/LLM">https://neurips.cc/Conferences/2025/LLM</a> ) |
| 1309 |     | for what should or should not be described.                                                                                        |
